# Supplementary material
Source: PubMed Central journal article supplement (PMC6349122)
Supplement: supp_RA118.004957_139539_1_supp_239316_phlnhh.pdf [file supp_RA118.004957_139539_1_supp_239316_phlnhh.pdf]

Supporting Table 1. Binding of the MGL variants to the glycan array developed by the Consortium of Functional Glycomics.

| Chart Number |                                                                                                      | MGL <sup>short</sup><br>200 µg/ml |       |             |       | MGL <sup>short</sup> H259T<br>200 µg/ml |       |             |       | MGL <sup>long</sup><br>200 µg/ml |       |             |       |
|--------------|------------------------------------------------------------------------------------------------------|-----------------------------------|-------|-------------|-------|-----------------------------------------|-------|-------------|-------|----------------------------------|-------|-------------|-------|
|              |                                                                                                      | Average RFU                       | StDev | Average RFU | StDev | Average RFU                             | StDev | Average RFU | StDev | Average RFU                      | StDev | Average RFU | StDev |
| 1            | Gala-Sp8                                                                                             | 14                                | 14    | 9           | 8     | 13                                      | 5     | 6           | 4     | 12                               | 11    | 2           | 9     |
| 2            | Glca-Sp8                                                                                             | 25                                | 19    | 18          | 8     | 20                                      | 14    | 8           | 9     | 22                               | 15    | 17          | 7     |
| 3            | Mana-Sp8                                                                                             | 270                               | 140   | 2440        | 3057  | 11                                      | 10    | 9           | 9     | 1094                             | 818   | 713         | 848   |
| 4            | GalNAca-Sp8                                                                                          | 8569                              | 2874  | 31679       | 2776  | 7623                                    | 4869  | 19927       | 3316  | 9656                             | 7400  | 1599        | 75    |
| 5            | GalNAca-Sp15                                                                                         | 9448                              | 890   | 29656       | 2480  | 520                                     | 146   | 247         | 33    | 15202                            | 3336  | 3650        | 323   |
| 6            | Fuca-Sp8                                                                                             | 113                               | 23    | 41          | 7     | 33                                      | 10    | 21          | 4     | 94                               | 16    | 20          | 4     |
| 7            | Fuca-Sp9                                                                                             | 52                                | 38    | -180        | 127   | 17                                      | 10    | 4           | 6     | -25                              | 105   | -3          | 4     |
| 8            | Rhaa-Sp8                                                                                             | 103                               | 30    | 18          | 8     | 31                                      | 18    | 12          | 5     | 81                               | 8     | 13          | 8     |
| 9            | Neu5Aca-Sp8                                                                                          | 16                                | 14    | 12          | 7     | 5                                       | 6     | 15          | 12    | 13                               | 18    | 10          | 6     |
| 10           | Neu5Aca-Sp11                                                                                         | 11                                | 6     | 26          | 13    | 16                                      | 9     | 13          | 7     | 14                               | 10    | 7           | 5     |
| 11           | Neu5Acb-Sp8                                                                                          | 199                               | 12    | 15          | 12    | 49                                      | 20    | 18          | 2     | 248                              | 12    | 16          | 4     |
| 12           | Galb-Sp8                                                                                             | 62                                | 10    | 20          | 3     | 21                                      | 17    | 10          | 6     | 62                               | 12    | 14          | 3     |
| 13           | Glc-Sp8                                                                                              | 47                                | 8     | -58         | 60    | 14                                      | 5     | 6           | 2     | 25                               | 13    | 19          | 4     |
| 14           | Manb-Sp8                                                                                             | 70                                | 32    | 20          | 8     | 22                                      | 10    | 6           | 3     | 41                               | 35    | 7           | 6     |
| 15           | GalNAcb-Sp8                                                                                          | 14651                             | 2415  | 40039       | 2069  | 893                                     | 79    | 353         | 36    | 22495                            | 5252  | 4488        | 124   |
| 16           | GlcNAcb-Sp0                                                                                          | 80                                | 25    | 43          | 27    | 13                                      | 5     | 21          | 18    | 76                               | 17    | 16          | 8     |
| 17           | GlcNAcb-Sp8                                                                                          | -2                                | 7     | -8          | 24    | 15                                      | 11    | 4           | 6     | -6                               | 12    | 3           | 23    |
| 18           | GlcN(Gc)b-Sp8                                                                                        | -61                               | 87    | -6206       | 7358  | -21                                     | 14    | 6           | 7     | -362                             | 497   | -93         | 56    |
| 19           | Galb1-4GlcNAcb1-6(Galb1-4GlcNAcb1-3)GalNAca-Sp8                                                      | -25                               | 10    | -65         | 22    | 4                                       | 3     | 3           | 3     | -26                              | 6     | -6          | 5     |
| 20           | Galb1-4GlcNAcb1-6(Galb1-4GlcNAcb1-3)GalNAca-Sp14                                                     | 260                               | 72    | 186         | 25    | 42                                      | 14    | 11          | 2     | 187                              | 21    | 86          | 18    |
| 21           | GlcNAcb1-6(GlcNAcb1-4)(GlcNAcb1-3)GlcNAcb-Sp8                                                        | 24                                | 11    | 450         | 752   | 19                                      | 11    | 6           | 6     | 21                               | 13    | 9           | 9     |
| 22           | 6S(3S)Galb1-4(6S)GlcNAcb-Sp0                                                                         | 44                                | 11    | 6           | 5     | 36                                      | 15    | 18          | 10    | 38                               | 8     | 10          | 4     |
| 23           | 6S(3S)Galb1-4GlcNAcb-Sp0                                                                             | 35                                | 11    | -9          | 54    | 20                                      | 13    | 17          | 8     | 25                               | 7     | 16          | 10    |
| 24           | (3S)Galb1-4(Fuca1-3)(6S)Glc-Sp0                                                                      | 87                                | 21    | 22          | 15    | 16                                      | 8     | 6           | 4     | 34                               | 10    | 25          | 10    |
| 25           | (3S)Galb1-4Glc-Sp8                                                                                   | 23                                | 6     | 106         | 159   | 20                                      | 10    | 7           | 6     | 27                               | 10    | 18          | 9     |
| 26           | (3S)Galb1-4(6S)Glc-Sp0                                                                               | 8                                 | 3     | 9           | 4     | 3                                       | 5     | 11          | 7     | 10                               | 5     | 7           | 5     |
| 27           | (3S)Galb1-4(6S)Glc-Sp8                                                                               | 25                                | 7     | 17          | 13    | 22                                      | 5     | 9           | 2     | 25                               | 9     | 27          | 5     |
| 28           | (3S)Galb1-3(Fuca1-4)GlcNAcb-Sp8                                                                      | 21                                | 8     | 26          | 6     | 15                                      | 8     | 25          | 13    | 33                               | 19    | 16          | 8     |
| 29           | (3S)Galb1-3GalNAca-Sp8                                                                               | 6                                 | 8     | 7           | 3     | 5                                       | 3     | 6           | 2     | 8                                | 2     | 2           | 6     |
| 30           | (3S)Galb1-3GlcNAcb-Sp0                                                                               | -201                              | 51    | -352        | 181   | -8                                      | 6     | 3           | 11    | -157                             | 31    | -100        | 22    |
| 31           | (3S)Galb1-3GlcNAcb-Sp8                                                                               | -1746                             | 209   | -10744      | 2336  | -47                                     | 13    | -66         | 31    | -3446                            | 272   | -1443       | 113   |
| 32           | (3S)Galb1-4(Fuca1-3)GlcNAcb-Sp0                                                                      | 36                                | 8     | 16          | 7     | 28                                      | 15    | 7           | 5     | 19                               | 14    | 15          | 2     |
| 33           | (3S)Galb1-4(Fuca1-3)GlcNAcb-Sp8                                                                      | 10                                | 4     | 15          | 5     | 18                                      | 10    | 8           | 4     | 20                               | 9     | 15          | 9     |
| 34           | (3S)Galb1-4(6S)GlcNAcb-Sp0                                                                           | 10                                | 4     | -36         | 27    | 1                                       | 3     | -1          | 1     | -15                              | 13    | 13          | 19    |
| 35           | (3S)Galb1-4(6S)GlcNAcb-Sp8                                                                           | 19                                | 7     | 10          | 5     | 14                                      | 5     | 10          | 2     | 15                               | 9     | 18          | 6     |
| 36           | (3S)Galb1-4GlcNAcb-Sp0                                                                               | 20                                | 6     | 18          | 7     | 12                                      | 5     | 10          | 10    | 29                               | 19    | 11          | 4     |
| 37           | (3S)Galb1-4GlcNAcb-Sp8                                                                               | 15                                | 14    | 11          | 9     | 7                                       | 7     | 3           | 6     | 20                               | 4     | 11          | 8     |
| 38           | (3S)Galb-Sp8                                                                                         | 20                                | 8     | 12          | 6     | 11                                      | 10    | 15          | 9     | 20                               | 8     | 12          | 7     |
| 39           | (6S)(4S)Galb1-4GlcNAcb-Sp0                                                                           | 5                                 | 7     | -27         | 62    | 5                                       | 3     | 2           | 4     | 23                               | 19    | 0           | 5     |
| 40           | (4S)Galb1-4GlcNAcb-Sp8                                                                               | 13                                | 3     | 6           | 6     | 5                                       | 6     | 6           | 6     | 17                               | 8     | 7           | 3     |
| 41           | (6P)Mana-Sp8                                                                                         | 14                                | 14    | 13          | 2     | 8                                       | 7     | 9           | 4     | 19                               | 6     | 11          | 4     |
| 42           | (6S)Galb1-4Glc-Sp0                                                                                   | 38                                | 5     | 17          | 9     | 10                                      | 5     | 7           | 4     | 30                               | 10    | 20          | 12    |
| 43           | (6S)Galb1-4Glc-Sp8                                                                                   | 42                                | 13    | 19          | 12    | 14                                      | 21    | 9           | 9     | 30                               | 10    | 14          | 5     |
| 44           | (6S)Galb1-4GlcNAcb-Sp8                                                                               | 0                                 | 8     | 1           | 3     | 14                                      | 8     | 15          | 7     | 18                               | 15    | 16          | 8     |
| 45           | (6S)Galb1-4(6S)Glc-Sp8                                                                               | 52                                | 14    | 217         | 263   | 11                                      | 6     | 5           | 6     | 28                               | 15    | -1          | 1     |
| 46           | Neu5Aca2-3(6S)Galb1-4GlcNAcb-Sp8                                                                     | 28                                | 10    | 9           | 3     | 19                                      | 19    | 10          | 2     | 15                               | 11    | 10          | 7     |
| 47           | (6S)GlcNAcb-Sp8                                                                                      | 30                                | 5     | 5           | 8     | 3                                       | 2     | 6           | 1     | 4                                | 19    | 10          | 6     |
| 48           | Neu5,9Aca8-Sp8                                                                                       | 32                                | 11    | 3           | 6     | 7                                       | 8     | 17          | 9     | 20                               | 7     | 6           | 4     |
| 49           | Neu5,9Aca2a2-6Galb1-4GlcNAcb-Sp8                                                                     | 9                                 | 10    | 177         | 338   | 18                                      | 3     | 6           | 3     | 20                               | 11    | 8           | 7     |
| 50           | Mana1-6(Mana1-3)Manb1-4GlcNAcb1-4GlcNAcb-Sp12                                                        | 26                                | 17    | 5           | 7     | 8                                       | 4     | 7           | 2     | 13                               | 9     | 6           | 5     |
| 51           | Mana1-6(Mana1-3)Manb1-4GlcNAcb1-4GlcNAcb-Sp13                                                        | -10                               | 11    | -5          | 9     | 10                                      | 7     | 3           | 5     | 5                                | 7     | -6          | 3     |
| 52           | GlcNAcb1-2Mana1-6(GlcNAcb1-2Mana1-3)Manb1-4GlcNAcb1-4GlcNAcb-Sp12                                    | 7                                 | 1     | 2           | 5     | 15                                      | 5     | 9           | 8     | 9                                | 3     | 16          | 8     |
| 53           | GlcNAcb1-2Mana1-6(GlcNAcb1-2Mana1-3)Manb1-4GlcNAcb1-4GlcNAcb-Sp13                                    | 22                                | 9     | 15          | 12    | 18                                      | 16    | 13          | 11    | 9                                | 2     | 11          | 8     |
| 54           | Galb1-4GlcNAcb1-2Mana1-6(Galb1-4GlcNAcb1-2Mana1-3)Manb1-4GlcNAcb1-4GlcNAcb-Sp12                      | 31                                | 27    | 167         | 325   | 8                                       | 4     | 2           | 5     | 29                               | 21    | 6           | 5     |
| 55           | Neu5Aca2-6Galb1-4GlcNAcb1-2Mana1-6(Neu5Aca2-6Galb1-4GlcNAcb1-2Mana1-3)Manb1-4GlcNAcb1-4GlcNAcb-Sp12  | 18                                | 16    | 6           | 9     | 12                                      | 6     | 2           | 4     | 12                               | 3     | 4           | 2     |
| 56           | Neu5Aca2-6Galb1-4GlcNAcb1-2Mana1-6(Neu5Aca2-6Galb1-4GlcNAcb1-2Man-a1-3)Manb1-4GlcNAcb1-4GlcNAcb-Sp21 | 6                                 | 14    | 10          | 10    | 29                                      | 22    | 10          | 7     | 10                               | 12    | 8           | 3     |
| 57           | Neu5Aca2-6Galb1-4GlcNAcb1-2Mana1-6(Neu5Aca2-6Galb1-4GlcNAcb1-2Mana1-3)Manb1-4GlcNAcb1-4GlcNAcb-Sp24  | 24                                | 18    | 20          | 10    | 1                                       | 2     | 11          | 5     | 10                               | 5     | 12          | 6     |

|     |                                                                                 |       |      |       |       |       |      |       |      |       |      |       |      |
|-----|---------------------------------------------------------------------------------|-------|------|-------|-------|-------|------|-------|------|-------|------|-------|------|
| 58  | Fuca1-2Galb1-3GalNAcb1-3Gala-Sp9                                                | 319   | 21   | 42    | 11    | 23    | 11   | 5     | 4    | 287   | 19   | 29    | 19   |
| 59  | Fuca1-2Galb1-3GalNAcb1-3Gala1-4Galb1-4Glc-Sp9                                   | 21    | 10   | 6     | 7     | 3     | 5    | 3     | 3    | 3     | 4    | 0     | 2    |
| 60  | Fuca1-2Galb1-3(Fuca1-4)GlcNAcb-Sp8                                              | 18    | 9    | 18    | 14    | 13    | 4    | 12    | 4    | 15    | 6    | 11    | 6    |
| 61  | Fuca1-2Galb1-3GalNAca-Sp8                                                       | 29    | 13   | 3     | 2     | 16    | 11   | 19    | 7    | 5     | 16   | 8     | 3    |
| 62  | Fuca1-2Galb1-3GalNAca-Sp14                                                      | 19    | 8    | 13    | 1     | 9     | 5    | 4     | 8    | 2     | 5    | 19    | 8    |
| 63  | Fuca1-2Galb1-3GalNAcb1-4(Neu5Aca2-3)Galb1-4Glc-Sp0                              | 6356  | 1112 | 2134  | 249   | 16    | 8    | 8     | 4    | 3276  | 579  | 765   | 39   |
| 64  | Fuca1-2Galb1-3GalNAcb1-4(Neu5Aca2-3)Galb1-4Glc-Sp9                              | 12    | 9    | 10    | 3     | 11    | 12   | 5     | 8    | 9     | 5    | 5     | 6    |
| 65  | Fuca1-2Galb1-3GlcNAcb1-3Galb1-4Glc-Sp8                                          | 25    | 6    | 15    | 13    | 9     | 2    | 8     | 5    | 15    | 14   | 8     | 4    |
| 66  | Fuca1-2Galb1-3GlcNAcb1-3Galb1-4Glc-Sp10                                         | 30    | 12   | 21    | 7     | 11    | 9    | 6     | 6    | 42    | 15   | 18    | 16   |
| 67  | Fuca1-2Galb1-3GlcNAcb-Sp0                                                       | 23    | 10   | 17    | 12    | 33    | 19   | 10    | 4    | 20    | 7    | 10    | 6    |
| 68  | Fuca1-2Galb1-3GlcNAcb-Sp8                                                       | 18    | 3    | 502   | 827   | 11    | 7    | 6     | 10   | 3     | 9    | 19    | 9    |
| 69  | Fuca1-2Galb1-4(Fuca1-3)GlcNAcb1-3Galb1-4(Fuca1-3)GlcNAcb-Sp0                    | 67    | 8    | 35    | 6     | 24    | 13   | 7     | 2    | 41    | 13   | 14    | 7    |
| 70  | Fuca1-2Galb1-4(Fuca1-3)GlcNAcb1-3Galb1-4(Fuca1-3)GlcNAcb1-4(Fuca1-3)GlcNAcb-Sp0 | 95    | 20   | 55    | 18    | 13    | 8    | 14    | 5    | 76    | 7    | 33    | 13   |
| 71  | Fuca1-2Galb1-4(Fuca1-3)GlcNAcb-Sp0                                              | 42    | 4    | 18    | 16    | 26    | 7    | 12    | 6    | 21    | 9    | 13    | 9    |
| 72  | Fuca1-2Galb1-4(Fuca1-3)GlcNAcb-Sp8                                              | 10    | 7    | 20    | 15    | -4    | 3    | 13    | 6    | 8     | 2    | 9     | 3    |
| 73  | Fuca1-2Galb1-4GlcNAcb1-3Galb1-4GlcNAcb-Sp0                                      | 6     | 4    | -8    | 26    | 1     | 3    | 4     | 2    | 10    | 9    | 7     | 7    |
| 74  | Fuca1-2Galb1-4GlcNAcb1-3Galb1-4GlcNAcb1-3Galb1-4GlcNAcb-Sp0                     | 11    | 9    | 12    | 9     | 9     | 5    | 6     | 3    | 23    | 9    | 8     | 1    |
| 75  | Fuca1-2Galb1-4GlcNAcb-Sp0                                                       | 18    | 11   | 11    | 9     | 7     | 4    | 6     | 6    | 14    | 9    | 7     | 6    |
| 76  | Fuca1-2Galb1-4GlcNAcb-Sp8                                                       | 6     | 9    | 9     | 6     | 16    | 14   | 6     | 7    | 25    | 17   | 4     | 2    |
| 77  | Fuca1-2Galb1-4Glc-Sp0                                                           | 51    | 9    | 27    | 14    | 12    | 16   | 10    | 5    | 60    | 15   | 0     | 7    |
| 78  | Fuca1-2Galb-Sp8                                                                 | 26    | 9    | 15    | 10    | 7     | 1    | 8     | 4    | 32    | 10   | 15    | 11   |
| 79  | Fuca1-3GlcNAcb-Sp8                                                              | 27    | 15   | 4     | 3     | 7     | 5    | 11    | 7    | 17    | 2    | 5     | 3    |
| 80  | Fuca1-4GlcNAcb-Sp8                                                              | 101   | 54   | 15    | 9     | 20    | 8    | 11    | 5    | 116   | 15   | 14    | 7    |
| 81  | Fucb1-3GlcNAcb-Sp8                                                              | 6     | 11   | 9     | 5     | 18    | 11   | 7     | 4    | 26    | 14   | 15    | 7    |
| 82  | GalNAca1-3(Fuca1-2)Galb1-3GlcNAcb-Sp0                                           | 2108  | 293  | 2776  | 163   | 17    | 8    | 9     | 6    | 7254  | 694  | 425   | 60   |
| 83  | GalNAca1-3(Fuca1-2)Galb1-4(Fuca1-3)GlcNAcb-Sp0                                  | 857   | 97   | 514   | 34    | 13    | 15   | 7     | 6    | 542   | 93   | 34    | 14   |
| 84  | (3S)Galb1-4(Fuca1-3)Glc-Sp0                                                     | 24    | 2    | 9     | 8     | 29    | 22   | 10    | 8    | 23    | 7    | 7     | 7    |
| 85  | GalNAca1-3(Fuca1-2)Galb1-4GlcNAcb-Sp0                                           | 6922  | 4671 | 2076  | 207   | 2     | 2    | -4    | 7    | 1801  | 596  | 196   | 59   |
| 86  | GalNAca1-3(Fuca1-2)Galb1-4GlcNAcb-Sp8                                           | 10001 | 2892 | 6650  | 600   | 10    | 3    | 6     | 10   | 9975  | 2532 | 942   | 81   |
| 87  | GalNAca1-3(Fuca1-2)Galb1-4Glc-Sp0                                               | 16108 | 2026 | 2516  | 177   | 12    | 5    | 10    | 3    | 1961  | 400  | 184   | 8    |
| 88  | GlcNAcb1-3Galb1-3GalNAca-Sp8                                                    | 196   | 32   | 136   | 27    | 10    | 3    | 18    | 5    | 95    | 16   | 38    | 10   |
| 89  | GalNAca1-3(Fuca1-2)Galb-Sp8                                                     | 22823 | 1238 | 2787  | 305   | 27    | 4    | 14    | 5    | 4298  | 1108 | 257   | 19   |
| 90  | GalNAca1-3(Fuca1-2)Galb-Sp18                                                    | 11531 | 2251 | 9455  | 710   | 16    | 11   | 12    | 1    | 3589  | 340  | 1669  | 892  |
| 91  | GalNAca1-3GalNAcb-Sp8                                                           | 17180 | 1937 | 5006  | 530   | 13    | 4    | 12    | 5    | 5056  | 268  | 369   | 30   |
| 92  | GalNAca1-3Galb-Sp8                                                              | 14580 | 2748 | 36704 | 3010  | 2521  | 203  | 474   | 26   | 16095 | 4289 | 6144  | 368  |
| 93  | GalNAca1-4(Fuca1-2)Galb1-4GlcNAcb-Sp8                                           | 37389 | 6950 | 43633 | 5609  | 11066 | 3362 | 9933  | 822  | 9965  | 3732 | 10604 | 1279 |
| 94  | GalNAcb1-3GalNAca-Sp8                                                           | 19408 | 902  | 13150 | 783   | 28    | 17   | 2     | 4    | 15086 | 1128 | 3741  | 90   |
| 95  | GalNAcb1-3(Fuca1-2)Galb-Sp8                                                     | 27117 | 1435 | 27701 | 3365  | 17307 | 2835 | 7847  | 1154 | 13612 | 1812 | 15192 | 3121 |
| 96  | GalNAcb1-3Gala1-4Galb1-4GlcNAcb-Sp0                                             | 3217  | 5696 | 4991  | 9331  | 1378  | 2722 | 118   | 233  | 5239  | 8922 | 1578  | 2605 |
| 97  | GalNAcb1-4(Fuca1-3)GlcNAcb-Sp0                                                  | 6720  | 481  | 24282 | 826   | 933   | 102  | 58    | 10   | 17936 | 1350 | 4259  | 341  |
| 98  | GalNAcb1-4GlcNAcb-Sp0                                                           | 4610  | 477  | 32293 | 5249  | 5133  | 862  | 406   | 21   | 9918  | 921  | 2480  | 479  |
| 99  | GalNAcb1-4GlcNAcb-Sp8                                                           | 404   | 761  | 12524 | 8013  | 4137  | 935  | -2304 | 2847 | 6901  | 1910 | 634   | 616  |
| 100 | Gala1-2Galb-Sp8                                                                 | 5     | 2    | 44    | 63    | 11    | 14   | 2     | 2    | 16    | 4    | -1    | 7    |
| 101 | Gala1-3(Fuca1-2)Galb1-3GlcNAcb-Sp0                                              | 22    | 6    | 41    | 37    | 11    | 10   | 3     | 5    | 21    | 21   | 6     | 8    |
| 102 | Gala1-3(Fuca1-2)Galb1-3GlcNAcb-Sp8                                              | 19    | 2    | 25    | 4     | 22    | 7    | 16    | 4    | 30    | 8    | 14    | 9    |
| 103 | Gala1-3(Fuca1-2)Galb1-4(Fuca1-3)GlcNAcb-Sp0                                     | -174  | 66   | -3378 | 1066  | 1     | 6    | -2    | 4    | -844  | 158  | -139  | 55   |
| 104 | Gala1-3(Fuca1-2)Galb1-4(Fuca1-3)GlcNAcb-Sp8                                     | 15    | 6    | 17    | 10    | 19    | 11   | 9     | 5    | 32    | 3    | 17    | 2    |
| 105 | Gala1-3(Fuca1-2)Galb1-4GlcNAcb-Sp0                                              | 22    | 9    | 27    | 14    | 7     | 5    | 7     | 3    | 18    | 8    | 6     | 10   |
| 106 | Gala1-3(Fuca1-2)Galb1-4Glc-Sp0                                                  | 34    | 13   | 18    | 4     | 14    | 5    | 7     | 4    | 56    | 9    | 12    | 4    |
| 107 | Gala1-3(Fuca1-2)Galb-Sp8                                                        | 7     | 10   | 15    | 7     | 17    | 10   | 11    | 6    | 12    | 8    | 8     | 9    |
| 108 | Gala1-3(Fuca1-2)Galb-Sp18                                                       | 12    | 11   | 11    | 11    | 12    | 4    | 10    | 4    | 8     | 9    | 8     | 5    |
| 109 | Gala1-4(Gala1-3)Galb1-4GlcNAcb-Sp8                                              | 53    | 19   | 13    | 4     | 19    | 9    | 24    | 7    | 20    | 12   | 36    | 5    |
| 110 | Gala1-3GalNAca-Sp8                                                              | 1010  | 269  | 2600  | 665   | 62    | 16   | 20    | 1    | 1990  | 349  | 351   | 13   |
| 111 | Gala1-3GalNAca-Sp16                                                             | 9     | 4    | 2     | 4     | 4     | 1    | 7     | 3    | -1    | 4    | 6     | 1    |
| 112 | Gala1-3GalNAcb-Sp8                                                              | 12    | 5    | 2     | 6     | 0     | 4    | 3     | 6    | 4     | 7    | 0     | 1    |
| 113 | Gala1-3Galb1-4(Fuca1-3)GlcNAcb-Sp8                                              | 15    | 7    | -3    | 2     | 10    | 8    | -1    | 2    | 10    | 12   | -3    | 5    |
| 114 | Gala1-3Galb1-3GlcNAcb-Sp0                                                       | 102   | 25   | 9     | 3     | 19    | 5    | 4     | 3    | 39    | 18   | 5     | 5    |
| 115 | Gala1-3Galb1-4GlcNAcb-Sp8                                                       | 15    | 4    | 30    | 36    | 11    | 11   | 7     | 7    | 5     | 3    | 3     | 5    |
| 116 | Gala1-3Galb1-4Glc-Sp0                                                           | 13    | 7    | 13    | 11    | 6     | 5    | 15    | 4    | 7     | 2    | 19    | 2    |
| 117 | Gala1-3Galb1-4Glc-Sp10                                                          | 17    | 8    | 880   | 597   | 4     | 4    | 15    | 8    | 16    | 5    | 13    | 8    |
| 118 | Gala1-3Galb-Sp8                                                                 | 26    | 8    | 22    | 13    | 6     | 1    | 8     | 4    | 29    | 27   | 18    | 11   |
| 119 | Gala1-4(Fuca1-2)Galb1-4GlcNAcb-Sp8                                              | 13    | 14   | 24    | 23    | 17    | 8    | 24    | 14   | 23    | 3    | 15    | 10   |
| 120 | Gala1-4Galb1-4GlcNAcb-Sp0                                                       | 20    | 9    | 19    | 15    | 22    | 11   | 16    | 7    | 23    | 8    | 14    | 7    |
| 121 | Gala1-4Galb1-4GlcNAcb-Sp8                                                       | 47    | 17   | 32    | 12    | 9     | 5    | 29    | 9    | 57    | 15   | 28    | 11   |
| 122 | Gala1-4Galb1-4Glc-Sp0                                                           | 627   | 510  | 11456 | 11488 | 85    | 41   | 28    | 20   | 2795  | 1896 | 439   | 236  |
| 123 | Gala1-4GlcNAcb-Sp8                                                              | -2    | 4    | 0     | 12    | -9    | 5    | 4     | 10   | -9    | 5    | 3     | 4    |
| 124 | Gala1-6Glc-Sp8                                                                  | 17    | 13   | 41    | 43    | 2     | 5    | 1     | 3    | 19    | 14   | 1     | 1    |

|     |                                                                                 |       |      |       |      |      |      |       |     |       |      |       |      |
|-----|---------------------------------------------------------------------------------|-------|------|-------|------|------|------|-------|-----|-------|------|-------|------|
| 125 | Galb1-2Galb-Sp8                                                                 | -4    | 20   | 4     | 46   | 5    | 8    | 3     | 14  | -40   | 140  | -2    | 23   |
| 126 | Galb1-3(Fuca1-4)GlcNAcb1-3Galb1-4(Fuca1-3)GlcNAcb-Sp0                           | 7     | 3    | -1    | 6    | 9    | 10   | 12    | 5   | 16    | 10   | 2     | 4    |
| 127 | Galb1-3GlcNAcb1-3Galb1-4(Fuca1-3)GlcNAcb-Sp0                                    | 9     | 5    | 11    | 7    | 9    | 3    | 2     | 5   | 14    | 7    | 4     | 9    |
| 128 | Galb1-3(Fuca1-4)GlcNAcb-Sp0                                                     | 12    | 15   | 0     | 6    | 0    | 2    | -3    | 2   | -3    | 4    | 0     | 7    |
| 129 | Galb1-3(Fuca1-4)GlcNAcb-Sp8                                                     | 60    | 6    | 120   | 85   | 9    | 2    | 10    | 10  | 118   | 16   | 33    | 8    |
| 130 | Fuca1-4(Galb1-3)GlcNAcb-Sp8                                                     | 50    | 16   | 81    | 31   | 4    | 12   | 7     | 7   | 24    | 15   | 12    | 5    |
| 131 | Galb1-4GlcNAcb1-6GalNAca-Sp8                                                    | 12699 | 751  | 54398 | 2348 | 5506 | 2778 | 15256 | 747 | 16021 | 733  | 10708 | 1099 |
| 132 | Galb1-4GlcNAcb1-6GalNAca-Sp14                                                   | 22910 | 1291 | 25374 | 2409 | 5119 | 333  | 1248  | 29  | 11094 | 1577 | 9135  | 1342 |
| 133 | GlcNAcb1-6(Galb1-3)GalNAca-Sp8                                                  | 82    | 19   | 104   | 53   | 52   | 54   | 25    | 19  | 155   | 45   | 109   | 97   |
| 134 | GlcNAcb1-6(Galb1-3)GalNAca-Sp14                                                 | 21    | 4    | 4     | 5    | 2    | 8    | 6     | 6   | 15    | 8    | 7     | 6    |
| 135 | Neu5Aca2-6(Galb1-3)GalNAca-Sp8                                                  | 5     | 12   | -95   | 126  | -3   | 6    | 3     | 2   | 5     | 7    | 3     | 7    |
| 136 | Neu5Aca2-6(Galb1-3)GalNAca-Sp14                                                 | 58    | 26   | 13    | 11   | 8    | 10   | 1     | 2   | 24    | 7    | 15    | 4    |
| 137 | Neu5Acb2-6(Galb1-3)GalNAca-Sp8                                                  | 12    | 3    | 8     | 2    | 11   | 11   | 10    | 7   | 6     | 4    | 4     | 3    |
| 138 | Neu5Aca2-6(Galb1-3)GlcNAcb1-4Galb1-4Glc-Sp10                                    | -2    | 29   | -15   | 5    | 2    | 2    | 9     | 1   | -30   | 20   | 1     | 9    |
| 139 | Galb1-3GalNAca-Sp8                                                              | 10    | 8    | -25   | 11   | 6    | 8    | 2     | 5   | 5     | 5    | -2    | 6    |
| 140 | Galb1-3GalNAca-Sp14                                                             | 33    | 9    | 98    | 107  | 10   | 5    | 10    | 8   | 18    | 15   | 12    | 6    |
| 141 | Galb1-3GalNAca-Sp16                                                             | -34   | 7    | -56   | 18   | 10   | 10   | 8     | 7   | -12   | 11   | -19   | 4    |
| 142 | Galb1-3GalNAcb-Sp8                                                              | 20    | 18   | 11    | 7    | 5    | 5    | -1    | 3   | 22    | 12   | 12    | 6    |
| 143 | Galb1-3GalNAcb1-3Gal1-4Galb1-4Glc-Sp0                                           | 1311  | 89   | 9328  | 269  | 23   | 18   | 25    | 3   | 6109  | 191  | 1122  | 157  |
| 144 | Galb1-3GalNAcb1-4(Neu5Aca2-3)Galb1-4Glc-Sp0                                     | 4189  | 151  | 4760  | 145  | 69   | 17   | 4     | 7   | 6822  | 1017 | 1188  | 86   |
| 145 | Galb1-3GalNAcb1-4Galb1-4Glc-Sp8                                                 | -1231 | 880  | -573  | 459  | 18   | 9    | 13    | 18  | -28   | 84   | -66   | 45   |
| 146 | Galb1-3Galb-Sp8                                                                 | -200  | 72   | -34   | 28   | 13   | 15   | 11    | 7   | -36   | 16   | -19   | 14   |
| 147 | Galb1-3GlcNAcb1-3Galb1-4GlcNAcb-Sp0                                             | -51   | 7    | -56   | 10   | 0    | 7    | 11    | 9   | -31   | 4    | -16   | 9    |
| 148 | Galb1-3GlcNAcb1-3Galb1-4Glc-Sp10                                                | 1     | 8    | 6     | 4    | 10   | 13   | 2     | 2   | 12    | 11   | 5     | 7    |
| 149 | Galb1-3GlcNAcb-Sp0                                                              | 16    | 7    | 21    | 12   | 6    | 8    | 10    | 3   | 8     | 7    | 14    | 4    |
| 150 | Galb1-3GlcNAcb-Sp8                                                              | 19    | 13   | 16    | 11   | 9    | 8    | 12    | 11  | 7     | 6    | 7     | 12   |
| 151 | Galb1-4(Fuca1-3)GlcNAcb-Sp0                                                     | 10    | 6    | 16    | 3    | 11   | 7    | 15    | 8   | 14    | 9    | 1     | 3    |
| 152 | Galb1-4(Fuca1-3)GlcNAcb-Sp8                                                     | 18    | 6    | 4     | 2    | 7    | 4    | 5     | 3   | 20    | 12   | 13    | 13   |
| 153 | Galb1-4(Fuca1-3)GlcNAcb1-3Galb1-4(Fuca1-3)GlcNAcb-Sp0                           | 47    | 19   | 15    | 7    | 22   | 17   | 23    | 12  | 41    | 16   | 12    | 5    |
| 154 | Galb1-4(Fuca1-3)GlcNAcb1-3Galb1-4(Fuca1-3)GlcNAcb1-3Galb1-4(Fuca1-3)GlcNAcb-Sp0 | 6     | 19   | -33   | 17   | 9    | 4    | 12    | 10  | -15   | 17   | -2    | 7    |
| 155 | Galb1-4(6S)Glc-Sp0                                                              | 59    | 7    | 13    | 10   | 15   | 6    | 14    | 15  | 45    | 18   | 18    | 19   |
| 156 | Galb1-4(6S)Glc-Sp8                                                              | -45   | 30   | -212  | 92   | 5    | 15   | 31    | 25  | -27   | 61   | 10    | 13   |
| 157 | Galb1-4GalNAca1-3(Fuca1-2)Galb1-4GlcNAcb-Sp8                                    | 16    | 8    | 7     | 11   | 5    | 2    | 4     | 2   | 10    | 4    | 7     | 8    |
| 158 | Galb1-4GalNAcb1-3(Fuca1-2)Galb1-4GlcNAcb-Sp8                                    | 49    | 18   | 46    | 14   | 2    | 8    | 9     | 4   | 52    | 21   | 8     | 8    |
| 159 | Galb1-4GlcNAcb1-3GalNAca-Sp8                                                    | 30    | 8    | -31   | 48   | 11   | 14   | 3     | 5   | 12    | 4    | 10    | 8    |
| 160 | Galb1-4GlcNAcb1-3GalNAca-Sp14                                                   | 11    | 4    | 9     | 9    | 7    | 4    | 3     | 2   | 27    | 5    | 13    | 6    |
| 161 | Galb1-4GlcNAcb1-3Galb1-4(Fuca1-3)GlcNAcb1-3Galb1-4(Fuca1-3)GlcNAcb-Sp0          | 116   | 15   | -50   | 96   | 10   | 6    | 5     | 4   | 54    | 6    | 9     | 4    |
| 162 | Galb1-4GlcNAcb1-3Galb1-4GlcNAcb1-3Galb1-4GlcNAcb-Sp0                            | 29    | 14   | 23    | 17   | 10   | 10   | 7     | 3   | 8     | 11   | 4     | 3    |
| 163 | Galb1-4GlcNAcb1-3Galb1-4GlcNAcb-Sp0                                             | 13    | 4    | -23   | 57   | 16   | 16   | -2    | 3   | 10    | 8    | 7     | 7    |
| 164 | Galb1-4GlcNAcb1-3Galb1-4Glc-Sp0                                                 | 7     | 3    | 8     | 6    | 10   | 3    | 4     | 5   | 25    | 6    | 15    | 12   |
| 165 | Galb1-4GlcNAcb1-3Galb1-4Glc-Sp8                                                 | 13    | 13   | 18    | 32   | 32   | 22   | 11    | 11  | 34    | 16   | 11    | 11   |
| 166 | Galb1-4GlcNAcb1-6(Galb1-3)GalNAca-Sp8                                           | 129   | 12   | 507   | 13   | 8    | 5    | 13    | 14  | 250   | 14   | 62    | 2    |
| 167 | Galb1-4GlcNAcb1-6(Galb1-3)GalNAca-Sp14                                          | 27    | 14   | 10    | 9    | 12   | 18   | 11    | 9   | 18    | 8    | 20    | 9    |
| 168 | Galb1-4GlcNAcb-Sp0                                                              | 29    | 29   | 8     | 15   | 5    | 3    | 3     | 4   | 9     | 17   | 29    | 39   |
| 169 | Galb1-4GlcNAcb-Sp8                                                              | 5     | 5    | 27    | 28   | 2    | 3    | 7     | 8   | 12    | 7    | 8     | 4    |
| 170 | Galb1-4GlcNAcb-Sp23                                                             | 1     | 7    | 11    | 11   | 7    | 4    | 4     | 3   | 1     | 3    | 5     | 4    |
| 171 | Galb1-4Glc-Sp0                                                                  | 10    | 10   | 9     | 2    | 3    | 3    | 15    | 5   | 19    | 17   | 5     | 9    |
| 172 | Galb1-4Glc-Sp8                                                                  | 7     | 5    | 18    | 6    | 7    | 6    | 5     | 12  | 12    | 5    | 6     | 8    |
| 173 | GlcNAca1-3Galb1-4GlcNAcb-Sp8                                                    | 7     | 4    | -5    | 6    | 0    | 6    | 8     | 5   | 8     | 7    | 8     | 5    |
| 174 | GlcNAca1-6Galb1-4GlcNAcb-Sp8                                                    | 8     | 8    | 144   | 254  | 17   | 10   | 13    | 10  | 14    | 6    | 12    | 4    |
| 175 | GlcNAcb1-2Galb1-3GalNAca-Sp8                                                    | 8     | 4    | 15    | 8    | 17   | 5    | 19    | 10  | 16    | 9    | 7     | 3    |
| 176 | GlcNAcb1-6(GlcNAcb1-3)GalNAca-Sp8                                               | 16    | 7    | 14    | 2    | 14   | 11   | 10    | 5   | 6     | 3    | 5     | 1    |
| 177 | GlcNAcb1-6(GlcNAcb1-3)GalNAca-Sp14                                              | 24    | 9    | 18    | 4    | 7    | 6    | 5     | 2   | 31    | 23   | 23    | 13   |
| 178 | GlcNAcb1-6(GlcNAcb1-3)Galb1-4GlcNAcb-Sp8                                        | 13    | 10   | -13   | 48   | 9    | 2    | 11    | 5   | 16    | 12   | 5     | 6    |
| 179 | GlcNAcb1-3GalNAca-Sp8                                                           | 41    | 23   | 53    | 29   | 45   | 23   | 86    | 54  | 136   | 18   | 178   | 15   |
| 180 | GlcNAcb1-3GalNAca-Sp14                                                          | 13    | 5    | 7     | 8    | 4    | 5    | 7     | 6   | 12    | 15   | -2    | 4    |
| 181 | GlcNAcb1-3Galb-Sp8                                                              | 2     | 27   | -317  | 340  | 0    | 11   | 3     | 2   | -37   | 19   | 5     | 11   |
| 182 | GlcNAcb1-3Galb1-4GlcNAcb-Sp0                                                    | -143  | 17   | -1274 | 370  | 16   | 8    | 3     | 4   | -72   | 38   | -9    | 3    |
| 183 | GlcNAcb1-3Galb1-4GlcNAcb-Sp8                                                    | -104  | 33   | -197  | 53   | 5    | 4    | 4     | 7   | -62   | 13   | -58   | 15   |
| 184 | GlcNAcb1-3Galb1-4GlcNAcb1-3Galb1-4GlcNAcb-Sp0                                   | 13    | 5    | 9     | 10   | 5    | 4    | 4     | 5   | 8     | 8    | 7     | 2    |
| 185 | GlcNAcb1-3Galb1-4Glc-Sp0                                                        | 50    | 24   | 12    | 7    | 14   | 5    | 7     | 1   | 28    | 10   | 7     | 4    |
| 186 | GlcNAcb1-4-MDPLys                                                               | 11    | 4    | -256  | 60   | 7    | 4    | 5     | 6   | 28    | 16   | 9     | 4    |
| 187 | GlcNAcb1-6(GlcNAcb1-4)GalNAca-Sp8                                               | -293  | 186  | -52   | 52   | -6   | 4    | 8     | 8   | -97   | 77   | -2    | 3    |
| 188 | GlcNAcb1-4Galb1-4GlcNAcb-Sp8                                                    | 17    | 8    | 14    | 7    | 5    | 3    | 7     | 5   | 14    | 6    | 17    | 11   |
| 189 | GlcNAcb1-4GlcNAcb1-4GlcNAcb1-4GlcNAcb1-4GlcNAcb1-4GlcNAcb1-Sp8                  | 15    | 3    | 6     | 2    | 2    | 9    | 8     | 8   | 15    | 10   | 13    | 14   |
| 190 | GlcNAcb1-4GlcNAcb1-4GlcNAcb1-4GlcNAcb1-4GlcNAcb1-Sp8                            | 12    | 12   | 13    | 8    | 8    | 7    | 2     | 2   | 10    | 11   | 8     | 8    |
| 191 | GlcNAcb1-4GlcNAcb1-4GlcNAcb-Sp8                                                 | -6    | 8    | 6     | 8    | 6    | 5    | 6     | 3   | -2    | 4    | 1     | 4    |

|     |                                                                                           |       |      |       |      |       |      |       |      |       |      |       |      |
|-----|-------------------------------------------------------------------------------------------|-------|------|-------|------|-------|------|-------|------|-------|------|-------|------|
| 192 | GlcNAcb1-6GalNAca-Sp8                                                                     | 3020  | 329  | 25209 | 6150 | 3055  | 233  | 10133 | 3144 | 11728 | 2440 | 2038  | 1056 |
| 193 | GlcNAcb1-6GalNAca-Sp14                                                                    | 8688  | 720  | 32628 | 3008 | 13573 | 4066 | 13930 | 666  | 22356 | 5427 | 6000  | 206  |
| 194 | GlcNAcb1-6Galb1-4GlcNAcb-Sp8                                                              | 22    | 11   | 7     | 5    | 14    | 3    | 0     | 7    | 35    | 7    | 33    | 12   |
| 195 | Glc1-4Glc-Sp8                                                                             | 19    | 9    | 24    | 10   | 8     | 6    | 16    | 5    | 58    | 38   | 23    | 16   |
| 196 | Glc1-4Glc-Sp8                                                                             | 7     | 17   | 8     | 7    | 2     | 4    | 5     | 5    | 3     | 3    | 3     | 2    |
| 197 | Glc1-6Glc1-6Glc-Sp8                                                                       | -11   | 13   | 1     | 2    | 6     | 7    | 5     | 9    | 2     | 5    | 6     | 4    |
| 198 | Glc1-4Glc-Sp8                                                                             | -1    | 8    | 9     | 3    | -1    | 5    | 6     | 7    | 17    | 16   | 6     | 3    |
| 199 | Glc1-6Glc-Sp8                                                                             | 6     | 6    | 14    | 3    | 21    | 6    | 6     | 4    | 12    | 9    | 1     | 4    |
| 200 | G-ol-Sp8                                                                                  | 28    | 9    | -4    | 34   | 13    | 7    | 7     | 2    | 20    | 6    | 8     | 7    |
| 201 | GlcAa-Sp8                                                                                 | 53    | 39   | 59    | 41   | 14    | 2    | 10    | 3    | 64    | 49   | 8     | 10   |
| 202 | GlcAb-Sp8                                                                                 | 26    | 8    | 20    | 10   | 9     | 4    | 7     | 5    | 32    | 8    | 12    | 4    |
| 203 | GlcAb1-3Galb-Sp8                                                                          | 35    | 24   | 15    | 9    | 14    | 7    | 21    | 19   | 14    | 4    | 10    | 9    |
| 204 | GlcAb1-6Galb-Sp8                                                                          | 23    | 13   | 4     | 11   | 12    | 2    | 9     | 8    | 30    | 11   | 10    | 5    |
| 205 | KDNa2-3Galb1-3GlcNAcb-Sp0                                                                 | 20    | 4    | 15    | 6    | 11    | 9    | 4     | 2    | 17    | 16   | 23    | 16   |
| 206 | KDNa2-3Galb1-4GlcNAcb-Sp0                                                                 | 52    | 24   | 108   | 87   | 19    | 10   | 22    | 6    | 70    | 58   | 33    | 15   |
| 207 | Mana1-2Mana1-2Mana1-3Mana-Sp9                                                             | 9     | 10   | -16   | 9    | 19    | 11   | 3     | 2    | 15    | 13   | -6    | 4    |
| 208 | Mana1-2Mana1-6(Mana1-2Mana1-3)Mana-Sp9                                                    | 3     | 3    | 8     | 8    | 14    | 10   | 3     | 6    | 9     | 7    | 21    | 8    |
| 209 | Mana1-2Mana1-3Mana-Sp9                                                                    | 20    | 3    | 11    | 7    | 12    | 3    | 8     | 4    | 8     | 6    | 3     | 2    |
| 210 | Mana1-6(Mana1-2Mana1-3)Mana1-6(Mana1-2Mana1-3)Manb1-4GlcNAcb1-4GlcNAcb-Sp12               | 51    | 21   | 13    | 3    | 14    | 3    | 8     | 5    | 18    | 9    | 8     | 7    |
| 211 | Mana1-2Mana1-6(Mana1-3)Mana1-6(Mana1-2Mana1-2Mana1-3)Manb1-4GlcNAcb1-4GlcNAcb-Sp12        | 1     | 1    | 4     | 9    | 3     | 5    | -1    | 5    | -10   | 20   | -4    | 6    |
| 212 | Mana1-2Mana1-6(Mana1-2Mana1-3)Mana1-6(Mana1-2Mana1-2Mana1-3)Manb1-4GlcNAcb1-4GlcNAcb-Sp12 | 26    | 10   | 11    | 4    | 8     | 7    | 8     | 8    | 29    | 7    | 10    | 5    |
| 213 | Mana1-6(Mana1-3)Mana-Sp9                                                                  | 5     | 4    | 6     | 3    | 5     | 7    | 8     | 12   | 19    | 13   | 4     | 3    |
| 214 | Mana1-2Mana1-2Mana1-6(Mana1-3)Mana-Sp9                                                    | 12    | 10   | 13    | 9    | 13    | 5    | 5     | 7    | 18    | 8    | 10    | 8    |
| 215 | Mana1-6(Mana1-3)Mana1-6(Mana1-2Mana1-3)Manb1-4GlcNAcb1-4GlcNAcb-Sp12                      | 45    | 52   | 532   | 688  | 13    | 6    | 18    | 15   | 2035  | 3851 | 29    | 25   |
| 216 | Mana1-6(Mana1-3)Mana1-6(Mana1-3)Manb1-4GlcNAcb1-4GlcNAcb-Sp12                             | 37    | 16   | 13    | 1    | 59    | 79   | 10    | 7    | 24    | 18   | 11    | 9    |
| 217 | Manb1-4GlcNAcb-Sp0                                                                        | 24    | 11   | -19   | 58   | 19    | 8    | 13    | 9    | 35    | 11   | 32    | 16   |
| 218 | Neu5Aca2-3Galb1-4GlcNAcb1-3Galb1-4(Fuca1-3)GlcNAcb-Sp0                                    | 1     | 5    | 3     | 6    | 21    | 20   | 3     | 4    | 25    | 26   | 5     | 10   |
| 219 | (3S)Galb1-4(Fuca1-3)(6S)GlcNAcb-Sp8                                                       | 17    | 7    | 4     | 1    | 6     | 6    | 3     | 4    | 20    | 21   | 4     | 4    |
| 220 | Fuca1-2(6S)Galb1-4GlcNAcb-Sp0                                                             | 1     | 4    | 0     | 23   | 15    | 14   | -2    | 5    | 9     | 3    | 8     | 8    |
| 221 | Fuca1-2Galb1-4(6S)GlcNAcb-Sp8                                                             | 7     | 4    | -1    | 4    | 6     | 11   | 14    | 5    | 11    | 6    | 6     | 6    |
| 222 | Fuca1-2(6S)Galb1-4(6S)Glc-Sp0                                                             | 2     | 5    | 5     | 10   | 12    | 12   | 9     | 6    | 11    | 5    | 4     | 4    |
| 223 | Neu5Aca2-3Galb1-3GalNAca-Sp8                                                              | 362   | 30   | 16    | 16   | 49    | 5    | 4     | 2    | 198   | 11   | 9     | 8    |
| 224 | Neu5Aca2-3Galb1-3GalNAca-Sp14                                                             | 87    | 12   | 21    | 5    | 17    | 13   | 5     | 5    | 44    | 12   | 16    | 10   |
| 225 | GalNAcb1-4(Neu5Aca2-8Neu5Aca2-8Neu5Aca2-3)Galb1-4Glc-Sp0                                  | 30467 | 793  | 25263 | 2902 | 220   | 65   | 4     | 5    | 29027 | 2154 | 11623 | 367  |
| 226 | GalNAcb1-4(Neu5Aca2-8Neu5Aca2-8Neu5Aca2-3)Galb1-4Glc-Sp0                                  | 30251 | 1122 | 24668 | 1805 | 615   | 62   | 73    | 15   | 11083 | 1485 | 9084  | 314  |
| 227 | Neu5Aca2-8Neu5Aca2-8Neu5Aca2-3Galb1-4Glc-Sp0                                              | 14    | 3    | 7     | 4    | 6     | 2    | 13    | 3    | 18    | 9    | 12    | 9    |
| 228 | GalNAcb1-4(Neu5Aca2-8Neu5Aca2-3)Galb1-4Glc-Sp0                                            | 29776 | 749  | 22462 | 4224 | 1240  | 168  | 86    | 13   | 6937  | 616  | 8225  | 622  |
| 229 | Neu5Aca2-8Neu5Aca2-8Neu5Aca-Sp8                                                           | 64    | 11   | 92    | 139  | 45    | 32   | 79    | 76   | 42    | 36   | 15    | 9    |
| 230 | Neu5Aca2-3(6S)Galb1-4(Fuca1-3)GlcNAcb-Sp8                                                 | 14    | 9    | 3     | 8    | 4     | 4    | 15    | 11   | 3     | 11   | 5     | 0    |
| 231 | GalNAcb1-4(Neu5Aca2-3)Galb1-4GlcNAcb-Sp0                                                  | 21481 | 7738 | 5001  | 1586 | 13    | 15   | 14    | 9    | 6201  | 3224 | 1845  | 52   |
| 232 | GalNAcb1-4(Neu5Aca2-3)Galb1-4GlcNAcb-Sp8                                                  | 14635 | 5667 | 5273  | 279  | 4     | 10   | 5     | 4    | 12460 | 2459 | 1311  | 213  |
| 233 | GalNAcb1-4(Neu5Aca2-3)Galb1-4Glc-Sp0                                                      | 24678 | 2988 | 13394 | 963  | 419   | 31   | 33    | 9    | 10459 | 2758 | 5584  | 351  |
| 234 | Neu5Aca2-3Galb1-3GalNAcb1-4(Neu5Aca2-3)Galb1-4Glc-Sp0                                     | 21    | 14   | 8     | 6    | 7     | 2    | 14    | 9    | 22    | 14   | 5     | 3    |
| 235 | Neu5Aca2-6(Neu5Aca2-3)GalNAca-Sp8                                                         | 40    | 14   | 26    | 7    | 8     | 1    | 3     | 1    | 62    | 30   | 15    | 3    |
| 236 | Neu5Aca2-3GalNAca-Sp8                                                                     | 116   | 11   | 41    | 9    | 11    | 6    | 18    | 8    | 343   | 24   | 35    | 9    |
| 237 | Neu5Aca2-3GalNAcb1-4GlcNAcb-Sp0                                                           | 10    | 3    | 13    | 12   | 15    | 4    | 12    | 4    | 13    | 3    | 12    | 3    |
| 238 | Neu5Aca2-3Galb1-3(6S)GlcNAcb-Sp8                                                          | 13    | 5    | 14    | 8    | 13    | 7    | 20    | 10   | 15    | 6    | 11    | 6    |
| 239 | Neu5Aca2-3Galb1-3(Fuca1-4)GlcNAcb-Sp8                                                     | 6     | 9    | 12    | 5    | 9     | 6    | 12    | 6    | 9     | 6    | -1    | 2    |
| 240 | Neu5Aca2-3Galb1-3(Fuca1-4)GlcNAcb1-3Galb1-4(Fuca1-3)GlcNAcb-Sp0                           | 195   | 44   | 108   | 18   | 59    | 21   | 21    | 10   | 94    | 39   | 21    | 14   |
| 241 | Neu5Aca2-3Galb1-4(Neu5Aca2-3Galb1-3)GlcNAcb-Sp8                                           | 501   | 734  | 1115  | 1533 | 33    | 16   | 12    | 2    | 203   | 116  | 17    | 27   |
| 242 | Neu5Aca2-3Galb1-3(6S)GalNAca-Sp8                                                          | 4     | 4    | 34    | 12   | 4     | 6    | 7     | 4    | 20    | 3    | 8     | 9    |
| 243 | Neu5Aca2-6(Neu5Aca2-3Galb1-3)GalNAca-Sp8                                                  | 30    | 14   | 53    | 55   | 1     | 7    | 2     | 6    | 16    | 3    | 11    | 12   |
| 244 | Neu5Aca2-6(Neu5Aca2-3Galb1-3)GalNAca-Sp14                                                 | 695   | 44   | 329   | 7    | 5     | 3    | 4     | 4    | 522   | 28   | 67    | 11   |
| 245 | Neu5Aca2-3Galb-Sp8                                                                        | 1     | 2    | -4    | 3    | 9     | 14   | 2     | 4    | 6     | 7    | 9     | 4    |
| 246 | Neu5Aca2-3Galb1-3GalNAcb1-3Gala1-4Galb1-4Glc-Sp0                                          | 61    | 21   | 501   | 523  | 9     | 3    | 5     | 8    | 36    | 13   | 5     | 6    |
| 247 | Neu5Aca2-3Galb1-3GlcNAcb1-3Galb1-4GlcNAcb-Sp0                                             | 7     | 12   | -1    | 3    | 6     | 2    | 11    | 6    | 3     | 6    | 10    | 6    |
| 248 | Fuca1-2(6S)Galb1-4Glc-Sp0                                                                 | 16    | 10   | 67    | 103  | 13    | 8    | 4     | 7    | 16    | 11   | 7     | 1    |
| 249 | Neu5Aca2-3Galb1-3GlcNAcb-Sp0                                                              | 46    | 18   | 11    | 13   | 22    | 10   | 10    | 2    | 14    | 12   | 14    | 8    |
| 250 | Neu5Aca2-3Galb1-3GlcNAcb-Sp8                                                              | 21    | 6    | 9     | 7    | 3     | 2    | 2     | 2    | -3    | 15   | 7     | 5    |
| 251 | Neu5Aca2-3Galb1-4(6S)GlcNAcb-Sp8                                                          | 5     | 5    | 51    | 56   | 3     | 7    | 10    | 5    | 7     | 5    | 17    | 8    |
| 252 | Neu5Aca2-3Galb1-4(Fuca1-3)(6S)GlcNAcb-Sp8                                                 | 6     | 8    | 26    | 7    | 12    | 9    | 21    | 1    | 83    | 75   | 26    | 24   |
| 253 | Neu5Aca2-3Galb1-4(Fuca1-3)GlcNAcb1-3Galb1-4(Fuca1-3)GlcNAcb-Sp0                           | 141   | 10   | 51    | 10   | 8     | 1    | 20    | 19   | 68    | 20   | 5     | 6    |
| 254 | Neu5Aca2-3Galb1-4(Fuca1-3)GlcNAcb-Sp0                                                     | 14    | 8    | -2    | 7    | 1     | 1    | -5    | 4    | -17   | 7    | -14   | 5    |
| 255 | Neu5Aca2-3Galb1-4(Fuca1-3)GlcNAcb-Sp8                                                     | 16    | 11   | 6     | 6    | 10    | 10   | 4     | 8    | 28    | 18   | 0     | 4    |
| 256 | Neu5Aca2-3Galb1-4(Fuca1-3)GlcNAcb1-3Galb-Sp8                                              | 10    | 6    | 8     | 3    | 10    | 3    | 8     | 3    | 3     | 5    | 11    | 4    |
| 257 | Neu5Aca2-3Galb1-4(Fuca1-3)GlcNAcb1-3Galb1-4GlcNAcb-Sp8                                    | 68    | 16   | 48    | 14   | 27    | 8    | 19    | 4    | 90    | 19   | 32    | 10   |
| 258 | Neu5Aca2-3Galb1-4GlcNAcb1-3Galb1-4GlcNAcb1-3Galb1-4GlcNAcb-Sp0                            | 3     | 4    | 5     | 8    | 4     | 4    | -1    | 3    | 5     | 2    | 5     | 4    |

|     |                                                                                           |       |      |       |      |      |     |      |     |       |      |      |     |
|-----|-------------------------------------------------------------------------------------------|-------|------|-------|------|------|-----|------|-----|-------|------|------|-----|
| 259 | Neu5Aca2-3Galb1-4GlcNAcb-Sp0                                                              | 12    | 10   | 13    | 9    | 4    | 3   | 3    | 2   | 18    | 7    | 9    | 12  |
| 260 | Neu5Aca2-3Galb1-4GlcNAcb-Sp8                                                              | 6     | 2    | 11    | 3    | 5    | 11  | 1    | 3   | 12    | 13   | 7    | 5   |
| 261 | Neu5Aca2-3Galb1-4GlcNAcb1-3Galb1-4GlcNAcb-Sp0                                             | -13   | 11   | -7    | 8    | 9    | 1   | 9    | 6   | -11   | 10   | -4   | 5   |
| 262 | Fuca1-2Galb1-4(6S)Glc-Sp0                                                                 | 18    | 6    | 6     | 6    | 10   | 7   | 16   | 9   | 26    | 10   | 19   | 20  |
| 263 | Neu5Aca2-3Galb1-4Glc-Sp0                                                                  | 35    | 18   | 34    | 26   | 17   | 8   | 17   | 11  | 72    | 25   | 35   | 24  |
| 264 | Neu5Aca2-3Galb1-4Glc-Sp8                                                                  | -128  | 124  | -3709 | 2211 | 11   | 21  | -29  | 28  | -1244 | 644  | -181 | 67  |
| 265 | Neu5Aca2-6GalNAca-Sp8                                                                     | 7927  | 942  | 33503 | 2869 | 182  | 2   | 100  | 30  | 5988  | 925  | 1806 | 122 |
| 266 | Neu5Aca2-6GalNAcb1-4GlcNAcb-Sp0                                                           | 11993 | 887  | 20900 | 1527 | 28   | 11  | 6    | 5   | 15215 | 2065 | 2683 | 125 |
| 267 | Neu5Aca2-6Galb1-4(6S)GlcNAcb-Sp8                                                          | 5     | 11   | 6     | 6    | 9    | 7   | 13   | 15  | 2     | 8    | 7    | 7   |
| 268 | Neu5Aca2-6Galb1-4GlcNAcb-Sp0                                                              | 29    | 21   | -12   | 32   | 7    | 6   | 6    | 5   | 11    | 10   | 13   | 7   |
| 269 | Neu5Aca2-6Galb1-4GlcNAcb-Sp8                                                              | 6     | 10   | 957   | 960  | 8    | 5   | 7    | 5   | 16    | 13   | 10   | 4   |
| 270 | Neu5Aca2-6Galb1-4GlcNAcb1-3Galb1-4(Fuca1-3)GlcNAcb1-3Galb1-4(Fuca1-3)GlcNAcb-Sp0          | 488   | 218  | 71    | 33   | 46   | 16  | 17   | 4   | 272   | 38   | 43   | 7   |
| 271 | Neu5Aca2-6Galb1-4GlcNAcb1-3Galb1-4GlcNAcb-Sp0                                             | 15    | 6    | 5     | 6    | 3    | 2   | 3    | 4   | 4     | 5    | 20   | 11  |
| 272 | Neu5Aca2-6Galb1-4Glc-Sp0                                                                  | 29    | 4    | 16    | 14   | 9    | 8   | 5    | 6   | 14    | 7    | 18   | 12  |
| 273 | Neu5Aca2-6Galb1-4Glc-Sp8                                                                  | 31    | 14   | 18    | 8    | 6    | 11  | 5    | 2   | 14    | 13   | 1    | 4   |
| 274 | Neu5Aca2-6Galb-Sp8                                                                        | 34    | 7    | 27    | 14   | 20   | 12  | 7    | 7   | 11    | 5    | 19   | 7   |
| 275 | Neu5Aca2-8Neu5Aca-Sp8                                                                     | 7     | 7    | 30    | 11   | -4   | 4   | 38   | 41  | 54    | 7    | 12   | 7   |
| 276 | Neu5Aca2-8Neu5Aca2-3Galb1-4Glc-Sp0                                                        | 31    | 6    | 9     | 7    | 13   | 7   | 6    | 4   | 21    | 6    | -1   | 4   |
| 277 | Galb1-3(Fuca1-4)GlcNAcb1-3Galb1-3(Fuca1-4)GlcNAcb-Sp0                                     | 54    | 28   | 25    | 14   | 7    | 5   | 5    | 3   | 28    | 27   | 10   | 14  |
| 278 | Neu5Acb2-6GalNAca-Sp8                                                                     | 1111  | 115  | 654   | 55   | 13   | 5   | 2    | 4   | 352   | 30   | 15   | 6   |
| 279 | Neu5Acb2-6Galb1-4GlcNAcb-Sp8                                                              | 13    | 7    | 18    | 4    | 10   | 4   | 1    | 5   | 16    | 14   | 0    | 6   |
| 280 | Neu5Gca2-3Galb1-3(Fuca1-4)GlcNAcb-Sp0                                                     | 18    | 10   | 12    | 3    | 17   | 9   | 15   | 7   | 27    | 9    | 20   | 6   |
| 281 | Neu5Gca2-3Galb1-3GlcNAcb-Sp0                                                              | 25    | 11   | 162   | 300  | 12   | 14  | 11   | 6   | 8     | 6    | 8    | 9   |
| 282 | Neu5Gca2-3Galb1-4(Fuca1-3)GlcNAcb-Sp0                                                     | 850   | 65   | 1384  | 91   | 23   | 3   | 13   | 3   | 4501  | 259  | 486  | 9   |
| 283 | Neu5Gca2-3Galb1-4GlcNAcb-Sp0                                                              | 7     | 8    | 27    | 18   | 10   | 14  | 2    | 3   | 19    | 17   | 11   | 5   |
| 284 | Neu5Gca2-3Galb1-4Glc-Sp0                                                                  | 12    | 9    | 21    | 4    | 4    | 3   | 6    | 7   | 43    | 8    | 10   | 8   |
| 285 | Neu5Gca2-6GalNAca-Sp0                                                                     | 1610  | 2119 | 6180  | 1991 | 20   | 22  | 9    | 16  | 4939  | 2990 | 1234 | 279 |
| 286 | Neu5Gca2-6Galb1-4GlcNAcb-Sp0                                                              | 17    | 13   | 10    | 6    | 12   | 7   | 9    | 3   | 21    | 12   | 10   | 10  |
| 287 | Neu5Gca-Sp8                                                                               | 10    | 4    | 13    | 9    | 1    | 6   | 13   | 9   | 12    | 4    | 8    | 9   |
| 288 | Neu5Aca2-3Galb1-4GlcNAcb1-6(Galb1-3)GalNAca-Sp14                                          | 30    | 12   | 14    | 10   | 24   | 6   | 18   | 11  | 12    | 11   | 29   | 20  |
| 289 | Galb1-3GlcNAcb1-3Galb1-3GlcNAcb-Sp0                                                       | 16    | 9    | 6     | 10   | 15   | 4   | 7    | 9   | 18    | 12   | -5   | 3   |
| 290 | Galb1-4(Fuca1-3)(6S)GlcNAcb-Sp0                                                           | 51    | 10   | 56    | 13   | 32   | 6   | 18   | 6   | 80    | 29   | 33   | 16  |
| 291 | Galb1-4(Fuca1-3)(6S)Glc-Sp0                                                               | 9     | 8    | 20    | 9    | 22   | 10  | 21   | 20  | 61    | 23   | 38   | 34  |
| 292 | Galb1-4(Fuca1-3)GlcNAcb1-3Galb1-3(Fuca1-4)GlcNAcb-Sp0                                     | 10    | 35   | -19   | 11   | 1    | 7   | 5    | 8   | -19   | 27   | -7   | 11  |
| 293 | Galb1-4GlcNAcb1-3Galb1-3GlcNAcb-Sp0                                                       | 7     | 7    | 15    | 18   | 10   | 7   | 8    | 4   | 8     | 10   | 5    | 2   |
| 294 | Neu5Aca2-3Galb1-3GlcNAcb1-3Galb1-3GlcNAcb-Sp0                                             | 8     | 7    | 7     | 5    | 8    | 12  | 0    | 4   | 35    | 19   | 3    | 5   |
| 295 | Neu5Aca2-3Galb1-4GlcNAcb1-3Galb1-3GlcNAcb-Sp0                                             | 8     | 8    | -49   | 66   | 11   | 6   | 8    | 3   | 9     | 4    | 5    | 5   |
| 296 | 4S(3S)Galb1-4GlcNAcb-Sp0                                                                  | 11    | 7    | 71    | 126  | 11   | 8   | 11   | 4   | 17    | 8    | 8    | 12  |
| 297 | (6S)Galb1-4(6S)GlcNAcb-Sp0                                                                | -14   | 4    | -1    | 5    | 10   | 8   | 8    | 4   | -8    | 3    | -1   | 3   |
| 298 | (6P)Glc-Sp10                                                                              | 37    | 19   | 8     | 8    | 10   | 5   | 9    | 2   | 32    | 4    | 7    | 12  |
| 299 | Neu5Aca2-3Galb1-4(Fuca1-3)GlcNAcb1-6(Galb1-3)GalNAca-Sp14                                 | 40    | 22   | 21    | 5    | 10   | 5   | 17   | 9   | 39    | 21   | 17   | 5   |
| 300 | Galb1-3Galb1-4GlcNAcb-Sp8                                                                 | 22    | 11   | 14    | 6    | 11   | 7   | 8    | 4   | 14    | 5    | 16   | 14  |
| 301 | Neu5Aca2-6Galb1-4GlcNAcb1-2Mana1-6(Galb1-4GlcNAcb1-2Mana1-3)Manb1-4GlcNAcb1-4GlcNAcb-Sp12 | 16    | 9    | 16    | 10   | 12   | 7   | 14   | 10  | 14    | 7    | 14   | 10  |
| 302 | Galb1-4GlcNAcb1-6(Galb1-4GlcNAcb1-3)Galb1-4GlcNAcb-Sp0                                    | 4     | 13   | 23    | 6    | 28   | 23  | 30   | 23  | 85    | 70   | 55   | 42  |
| 303 | GlcNAcb1-6(Galb1-4GlcNAcb1-3)Galb1-4GlcNAcb-Sp0                                           | -10   | 8    | -4    | 5    | 5    | 6   | 9    | 9   | -5    | 4    | 10   | 12  |
| 304 | Galb1-4GlcNAcb1-6Galb1-4GlcNAcb-Sp0                                                       | 6     | 6    | 5     | 5    | 22   | 15  | 10   | 5   | 7     | 9    | 10   | 14  |
| 305 | Galb1-4GlcNAcb1-6Galb1-4GlcNAcb-Sp0                                                       | 19    | 5    | 12    | 5    | 11   | 6   | 5    | 2   | 5     | 4    | 2    | 1   |
| 306 | GalNAcb1-3Galb-Sp8                                                                        | 18778 | 2221 | 30074 | 648  | 6585 | 656 | 2752 | 147 | 18048 | 4540 | 4457 | 336 |
| 307 | GlcAb1-3GlcNAcb-Sp8                                                                       | 8     | 6    | 1     | 7    | 12   | 8   | 9    | 9   | 30    | 20   | 16   | 9   |
| 308 | Neu5Aca2-6Galb1-4GlcNAcb1-2Mana1-6(GlcNAcb1-2Mana1-3)Manb1-4GlcNAcb1-4GlcNAcb-Sp12        | 4     | 5    | 12    | 5    | 14   | 12  | 4    | 4   | 30    | 31   | 11   | 14  |
| 309 | GlcNAcb1-3Man-Sp10                                                                        | 25    | 11   | 10    | 8    | 9    | 6   | 2    | 6   | 24    | 5    | 5    | 7   |
| 310 | GlcNAcb1-4GlcNAcb-Sp10                                                                    | 16    | 16   | 5     | 13   | 8    | 6   | 11   | 4   | 21    | 4    | 0    | 10  |
| 311 | GlcNAcb1-4GlcNAcb-Sp12                                                                    | 14    | 8    | 12    | 2    | 7    | 4   | 4    | 3   | 16    | 6    | 6    | 3   |
| 312 | MurNAcb1-4GlcNAcb-Sp10                                                                    | 9     | 16   | -69   | 86   | 7    | 3   | 11   | 9   | 16    | 27   | 5    | 3   |
| 313 | Mana1-6Manb-Sp10                                                                          | 21    | 15   | 6     | 9    | 9    | 4   | 6    | 2   | 83    | 99   | 3    | 4   |
| 314 | Mana1-6(Mana1-3)Mana1-6(Mana1-3)Manb-Sp10                                                 | 37    | 26   | -64   | 29   | 16   | 12  | 20   | 17  | -3    | 62   | 54   | 33  |
| 315 | Mana1-2Mana1-6(Mana1-3)Mana1-6(Mana1-2Mana1-3)Mana-Sp9                                    | 41    | 6    | 8     | 6    | 17   | 4   | 9    | 9   | 10    | 11   | 5    | 7   |
| 316 | Mana1-2Mana1-6(Mana1-2Mana1-3)Mana1-6(Mana1-2Mana1-2Mana1-3)Mana-Sp9                      | 14    | 6    | 15    | 8    | 5    | 3   | 10   | 5   | 17    | 8    | 12   | 12  |
| 317 | Neu5Aca2-3Galb1-4GlcNAcb1-6(Neu5Aca2-3Galb1-3)GalNAca-Sp14                                | 16    | 9    | 13    | 5    | 9    | 12  | 7    | 3   | 36    | 15   | 11   | 5   |
| 318 | Neu5Aca2-6Galb1-4GlcNAcb1-2Mana1-6(Neu5Aca2-3Galb1-4GlcNAcb1-4GlcNAcb1-4GlcNAcb-Sp12      | 16    | 5    | 14    | 3    | 10   | 3   | 3    | 2   | 19    | 4    | 8    | 2   |
| 319 | Galb1-4GlcNAcb1-2Mana1-6(Neu5Aca2-6Galb1-4GlcNAcb1-2Mana1-3)Manb1-4GlcNAcb1-4GlcNAcb-Sp12 | 28    | 16   | 18    | 5    | 7    | 7   | 13   | 9   | 13    | 11   | 17   | 13  |
| 320 | GlcNAcb1-2Mana1-6(Neu5Aca2-6Galb1-4GlcNAcb1-2Mana1-3)Manb1-4GlcNAcb1-4GlcNAcb-Sp12        | 6     | 5    | 12    | 7    | 22   | 7   | 4    | 6   | 2     | 3    | 8    | 10  |
| 321 | Neu5Aca2-8Neu5Acb-Sp17                                                                    | 35    | 3    | 18    | 9    | 10   | 7   | 2    | 2   | 39    | 13   | 13   | 11  |
| 322 | Neu5Aca2-8Neu5Aca2-8Neu5Acb-Sp8                                                           | 8     | 5    | 9     | 5    | 9    | 6   | 19   | 14  | 5     | 3    | 9    | 11  |
| 323 | Neu5Gcb2-6Galb1-4GlcNAcb-Sp8                                                              | 12    | 6    | 11    | 12   | 6    | 4   | 10   | 5   | 20    | 2    | 11   | 6   |
| 324 | Galb1-3GlcNAcb1-2Mana1-6(Galb1-3GlcNAcb1-2Mana1-3)Manb1-4GlcNAcb1-4GlcNAcb-Sp19           | 51    | 27   | 10    | 9    | 10   | 0   | 5    | 4   | 39    | 21   | 6    | 3   |

|     |                                                                                                                       |       |      |       |       |     |     |     |     |       |      |      |     |
|-----|-----------------------------------------------------------------------------------------------------------------------|-------|------|-------|-------|-----|-----|-----|-----|-------|------|------|-----|
| 325 | Neu5Aca2-3Galb1-4GlcNAcb1-2Mana1-6(Neu5Aca2-3Galb1-4GlcNAcb1-2Mana1-3)Manb1-4GlcNAcb1-4GlcNAcb-Sp12                   | 24    | 14   | 27    | 31    | 46  | 44  | 96  | 114 | 271   | 44   | 244  | 181 |
| 326 | Neu5Aca2-3Galb1-4GlcNAcb1-2Mana1-6(Neu5Aca2-6Galb1-4GlcNAcb1-2Mana1-3)Manb1-4GlcNAcb1-4GlcNAcb-Sp12                   | 5     | 2    | 11    | 6     | 9   | 7   | 1   | 1   | 4     | 5    | 5    | 1   |
| 327 | Galb1-4(Fuca1-3)GlcNAcb1-2Mana1-6(Galb1-4(Fuca1-3)GlcNAcb1-2Mana1-3)Manb1-4GlcNAcb1-4GlcNAcb-Sp20                     | 12    | 18   | 13    | 8     | -1  | 7   | 9   | 9   | 6     | 7    | 5    | 5   |
| 328 | Neu5,9Ac2a2-3Galb1-4GlcNAcb-Sp0                                                                                       | 4     | 1    | -94   | 89    | 12  | 6   | 11  | 11  | -13   | 6    | 14   | 5   |
| 329 | Neu5,9Ac2a2-3Galb1-3GlcNAcb-Sp0                                                                                       | -8    | 17   | 0     | 8     | 1   | 3   | 11  | 5   | 0     | 11   | 7    | 4   |
| 330 | Neu5Aca2-6Galb1-4GlcNAcb1-3Galb1-3GlcNAcb-Sp0                                                                         | 12    | 4    | -32   | 27    | 5   | 5   | -1  | 11  | 5     | 7    | 12   | 4   |
| 331 | Neu5Aca2-3Galb1-3(Fuca1-4)GlcNAcb1-3Galb1-3(Fuca1-4)GlcNAcb-Sp0                                                       | 293   | 110  | 108   | 91    | 14  | 1   | 7   | 5   | 273   | 45   | 75   | 24  |
| 332 | Neu5Aca2-6Galb1-4GlcNAcb1-3Galb1-4GlcNAcb1-3Galb1-4GlcNAcb-Sp0                                                        | 10    | 11   | -109  | 133   | 7   | 7   | 8   | 7   | 19    | 4    | 14   | 13  |
| 333 | Gala1-4Galb1-4GlcNAcb1-3Galb1-4Glc-Sp0                                                                                | 16    | 11   | 2     | 5     | 10  | 4   | 12  | 14  | 10    | 3    | 17   | 10  |
| 334 | GalNAcb1-3Gala1-4Galb1-4GlcNAcb1-3Galb1-4Glc-Sp0                                                                      | 2480  | 514  | 29984 | 14247 | 730 | 119 | 440 | 296 | 7671  | 1532 | 1616 | 619 |
| 335 | GalNAca1-3(Fuca1-2)Galb1-4GlcNAcb1-3Galb1-4GlcNAcb-Sp0                                                                | 2019  | 924  | 4363  | 349   | 9   | 11  | 7   | 4   | 4358  | 1096 | 111  | 30  |
| 336 | GalNAca1-3(Fuca1-2)Galb1-4GlcNAcb1-3Galb1-4GlcNAcb1-3Galb1-4GlcNAcb-Sp0                                               | 560   | 89   | 2550  | 158   | 15  | 14  | 6   | 4   | 3711  | 287  | 84   | 14  |
| 337 | Neu5Aca2-3Galb1-4(Fuca1-3)GlcNAcb1-6(Neu5Aca2-3Galb1-3)GalNAc-Sp14                                                    | 36    | 30   | 54    | 52    | 11  | 6   | 8   | 5   | 61    | 69   | 22   | 14  |
| 338 | GlcNAca1-4Galb1-4GlcNAcb1-3Galb1-4GlcNAcb1-3Galb1-4GlcNAcb-Sp0                                                        | 5     | 2    | -37   | 64    | 6   | 6   | 8   | 8   | 12    | 7    | 16   | 9   |
| 339 | GlcNAca1-4Galb1-4GlcNAcb-Sp0                                                                                          | 11    | 4    | 2     | 6     | 10  | 7   | 4   | 5   | 12    | 13   | 4    | 5   |
| 340 | GlcNAca1-4Galb1-3GlcNAcb-Sp0                                                                                          | 15    | 8    | 581   | 567   | 14  | 14  | 10  | 5   | 20    | 11   | 8    | 7   |
| 341 | GlcNAca1-4Galb1-4GlcNAcb1-3Galb1-4Glc-Sp0                                                                             | 14    | 6    | 7     | 1     | 8   | 7   | 11  | 8   | 8     | 3    | 12   | 7   |
| 342 | GlcNAca1-4Galb1-4GlcNAcb1-3Galb1-4(Fuca1-3)GlcNAcb1-3Galb1-4(Fuca1-3)GlcNAcb-Sp0                                      | 83    | 11   | 23    | 7     | 28  | 12  | 15  | 2   | 44    | 17   | 20   | 9   |
| 343 | GlcNAca1-4Galb1-4GlcNAcb1-3Galb1-4GlcNAcb-Sp0                                                                         | 9     | 16   | 13    | 8     | 12  | 8   | 9   | 3   | 6     | 8    | 12   | 7   |
| 344 | GlcNAca1-4Galb1-3GalNAc-Sp14                                                                                          | 14    | 8    | 2     | 2     | 7   | 6   | 13  | 6   | 21    | 9    | 4    | 9   |
| 345 | Neu5Aca2-6Galb1-4GlcNAcb1-2Mana1-6(Mana1-3)Manb1-4GlcNAcb1-4GlcNAcb-Sp12                                              | 19    | 15   | 15    | 5     | 10  | 4   | 13  | 9   | 15    | 4    | 11   | 5   |
| 346 | Mana1-6(Neu5Aca2-6Galb1-4GlcNAcb1-2Mana1-3)Manb1-4GlcNAcb1-4GlcNAcb-Sp12                                              | -22   | 7    | -87   | 17    | 7   | 3   | 7   | 5   | -16   | 9    | 0    | 14  |
| 347 | Neu5Aca2-6Galb1-4GlcNAcb1-2Mana1-6Manb1-4GlcNAcb1-4GlcNAcb-Sp12                                                       | 21    | 9    | 10    | 1     | 19  | 6   | 12  | 3   | 5     | 6    | 19   | 12  |
| 348 | Neu5Aca2-6Galb1-4GlcNAcb1-2Mana1-3Manb1-4GlcNAcb1-4GlcNAcb-Sp12                                                       | 74    | 48   | 100   | 61    | 140 | 95  | 117 | 63  | 312   | 205  | 146  | 142 |
| 349 | Galb1-4GlcNAcb1-2Mana1-3Manb1-4GlcNAcb1-4GlcNAcb-Sp12                                                                 | -1    | 13   | -1    | 2     | 0   | 3   | 10  | 8   | 4     | 2    | -3   | 4   |
| 350 | Galb1-4GlcNAcb1-2Mana1-6Manb1-4GlcNAcb1-4GlcNAcb-Sp12                                                                 | 6     | 9    | 8     | 2     | 13  | 4   | 9   | 8   | 11    | 7    | 7    | 7   |
| 351 | Mana1-6(Galb1-4GlcNAcb1-2Mana1-3)Manb1-4GlcNAcb1-4GlcNAcb-Sp12                                                        | 154   | 7    | 32    | 55    | 15  | 6   | 3   | 4   | 125   | 6    | 18   | 8   |
| 352 | GlcNAcb1-2Mana1-6(GlcNAcb1-2Mana1-3)Manb1-4GlcNAcb1-4(Fuca1-6)GlcNAcb-Sp22                                            | 28    | 9    | 24    | 11    | 17  | 5   | 5   | -3  | 25    | 16   | 5    | 5   |
| 353 | Galb1-4GlcNAcb1-2Mana1-6(Galb1-4GlcNAcb1-2Mana1-3)Manb1-4GlcNAcb1-4(Fuca1-6)GlcNAcb-Sp22                              | 18    | 10   | 12    | 2     | 8   | 6   | 11  | 11  | 20    | 7    | 9    | 8   |
| 354 | Galb1-3GlcNAcb1-2Mana1-6(Galb1-3GlcNAcb1-2Mana1-3)Manb1-4GlcNAcb1-4(Fuca1-6)GlcNAcb-Sp22                              | -18   | 17   | 2     | 1     | 3   | 1   | 10  | 6   | 6     | 8    | 17   | 8   |
| 355 | (6S)GlcNAcb1-3Galb1-4GlcNAcb-Sp0                                                                                      | 9     | 7    | -220  | 111   | 13  | 7   | 13  | 5   | 16    | 12   | 22   | 6   |
| 356 | KDNa2-3Galb1-4(Fuca1-3)GlcNAcb-Sp0                                                                                    | 13    | 7    | 10    | 4     | 3   | 7   | 12  | 5   | 17    | 17   | 17   | 19  |
| 357 | KDNa2-6Galb1-4GlcNAcb-Sp0                                                                                             | 4     | 4    | -22   | 67    | 3   | 5   | -4  | 8   | 14    | 2    | 19   | 2   |
| 358 | KDNa2-3Galb1-4Glc-Sp0                                                                                                 | 8     | 8    | 11    | 3     | 11  | 14  | 2   | 6   | 29    | 8    | 6    | 5   |
| 359 | KDNa2-3Galb1-3GalNAca-Sp14                                                                                            | 120   | 27   | 62    | 24    | 6   | 5   | 8   | 4   | 97    | 57   | 8    | 2   |
| 360 | Fuca1-2Galb1-3GlcNAcb1-2Mana1-6(Fuca1-2Galb1-3GlcNAcb1-2Mana1-3)Manb1-4GlcNAcb1-4GlcNAcb-Sp20                         | 192   | 52   | 155   | 41    | 106 | 52  | 11  | 3   | 293   | 105  | 101  | 28  |
| 361 | Fuca1-2Galb1-4GlcNAcb1-2Mana1-6(Fuca1-2Galb1-4GlcNAcb1-2Mana1-3)Manb1-4GlcNAcb1-4GlcNAcb-Sp20                         | 150   | 35   | 48    | 14    | 27  | 9   | 12  | 10  | 93    | 43   | 43   | 7   |
| 362 | Fuca1-2Galb1-4(Fuca1-3)GlcNAcb1-2Mana1-6(Fuca1-2Galb1-4(Fuca1-3)GlcNAcb1-2Mana1-3)Manb1-4GlcNAcb1-4GlcNAcb-Sp20       | 217   | 29   | 41    | 8     | 33  | 19  | 19  | 13  | 88    | 15   | 24   | 10  |
| 363 | Gala1-3Galb1-4GlcNAcb1-2Mana1-6(Gala1-3Galb1-4GlcNAcb1-2Mana1-3)Manb1-4GlcNAcb1-4GlcNAcb-Sp20                         | 15    | 5    | 242   | 383   | 7   | 4   | 15  | 14  | 15    | 12   | 10   | 10  |
| 364 | Galb1-4GlcNAcb1-2Mana1-6(Mana1-3)Manb1-4GlcNAcb1-4GlcNAcb-Sp12                                                        | 40    | 11   | 24    | 15    | 19  | 16  | 17  | 12  | 29    | 25   | 18   | 8   |
| 365 | Fuca1-4(Galb1-3)GlcNAcb1-2Mana1-6(Fuca1-4(Galb1-3)GlcNAcb1-2Mana1-3)Manb1-4GlcNAcb1-4(Fuca1-6)GlcNAcb-Sp22            | 485   | 22   | 194   | 32    | 25  | 9   | 11  | 4   | 295   | 30   | 80   | 21  |
| 366 | Neu5Aca2-6GlcNAcb1-4GlcNAcb-Sp21                                                                                      | -3    | 1    | 1     | 4     | 9   | 3   | 2   | 7   | 5     | 1    | -1   | 5   |
| 367 | Neu5Aca2-6GlcNAcb1-4GlcNAcb1-4GlcNAcb-Sp21                                                                            | 21    | 13   | 12    | 9     | 3   | 4   | -1  | 6   | 14    | 6    | 6    | 5   |
| 368 | Galb1-4(Fuca1-3)GlcNAcb1-6(Fuca1-2Galb1-4GlcNAcb1-3)Galb1-4Glc-Sp21                                                   | 18    | 5    | 16    | 5     | 15  | 7   | 10  | 4   | 21    | 11   | 24   | 5   |
| 369 | Galb1-4GlcNAcb1-2Mana1-6(Galb1-4GlcNAcb1-4(Galb1-4GlcNAcb1-2)Mana1-3)Manb1-4GlcNAcb1-4GlcNAcb-Sp21                    | 10    | 2    | 8     | 5     | 5   | 3   | 5   | 6   | 8     | 11   | 4    | 6   |
| 370 | GalNAca1-3(Fuca1-2)Galb1-4GlcNAcb1-2Mana1-6(GalNAca1-3(Fuca1-2)Galb1-4GlcNAcb1-2Mana1-3)Manb1-4GlcNAcb1-4GlcNAcb-Sp20 | 24579 | 2708 | 5272  | 173   | 20  | 11  | 10  | 8   | 4921  | 1116 | 700  | 64  |
| 371 | Gala1-3(Fuca1-2)Galb1-4GlcNAcb1-2Mana1-6(Gala1-3(Fuca1-2)Galb1-4GlcNAcb1-2Mana1-3)Manb1-4GlcNAcb1-4GlcNAcb-Sp20       | 28    | 23   | 9     | 3     | 15  | 13  | 23  | 12  | 40    | 22   | 19   | 5   |
| 372 | Gala1-3Galb1-4(Fuca1-3)GlcNAcb1-2Mana1-6(Gala1-3Galb1-4(Fuca1-3)GlcNAcb1-2Mana1-3)Manb1-4GlcNAcb1-4GlcNAcb-Sp20       | 52    | 49   | 23    | 11    | 10  | 6   | 7   | 4   | 64    | 5    | 5    | 6   |
| 373 | GalNAca1-3(Fuca1-2)Galb1-3GlcNAcb1-2Mana1-6(GalNAca1-3(Fuca1-2)Galb1-3GlcNAcb1-2Mana1-3)Manb1-4GlcNAcb1-4GlcNAcb-Sp20 | 757   | 63   | 3252  | 283   | 7   | 5   | 8   | 2   | 1230  | 89   | 180  | 77  |
| 374 | Gala1-3(Fuca1-2)Galb1-3GlcNAcb1-2Mana1-6(Gala1-3(Fuca1-2)Galb1-3GlcNAcb1-2Mana1-3)Manb1-4GlcNAcb1-4GlcNAcb-Sp20       | 19    | 11   | 13    | 5     | 6   | 3   | 3   | 3   | 40    | 15   | 12   | 9   |
| 375 | Fuca1-4(Fuca1-2Galb1-3)GlcNAcb1-2Mana1-3(Fuca1-4(Fuca1-2Galb1-3)GlcNAcb1-2Mana1-3)Manb1-4GlcNAcb1-4GlcNAcb-Sp19       | 60    | 9    | 17    | 5     | 23  | 13  | 14  | 9   | 151   | 36   | 14   | 2   |
| 376 | Neu5Aca2-3Galb1-4GlcNAcb1-3GalNAc-Sp14                                                                                | 12    | 3    | 5     | 6     | 4   | 4   | 4   | 3   | 8     | 3    | 5    | 2   |
| 377 | Neu5Aca2-6Galb1-4GlcNAcb1-3GalNAc-Sp14                                                                                | 1385  | 75   | 1145  | 701   | 21  | 4   | 12  | 7   | 1310  | 27   | 219  | 41  |
| 378 | Neu5Aca2-3Galb1-4(Fuca1-3)GlcNAcb1-3GalNAca-Sp14                                                                      | 265   | 34   | 155   | 10    | 84  | 11  | 73  | 42  | 252   | 23   | 104  | 8   |
| 379 | GalNAcb1-4GlcNAcb1-2Mana1-6(GalNAcb1-4GlcNAcb1-2Mana1-3)Manb1-4GlcNAcb1-4GlcNAcb-Sp12                                 | 16066 | 1176 | 38475 | 3541  | 308 | 49  | 47  | 11  | 24662 | 4518 | 3943 | 214 |
| 380 | Galb1-3GalNAca1-3(Fuca1-2)Galb1-4Glc-Sp0                                                                              | 19    | 6    | -126  | 166   | 5   | 4   | 11  | 8   | -8    | 19   | 12   | 7   |
| 381 | Galb1-3GalNAca1-3(Fuca1-2)Galb1-4GlcNAcb-Sp0                                                                          | 13    | 9    | 0     | 3     | 17  | 13  | 1   | 3   | 0     | 6    | 3    | 3   |
| 382 | Galb1-3GlcNAcb1-3Galb1-4GlcNAcb1-6(Galb1-3GlcNAcb1-3)Galb1-4Glc-Sp0                                                   | 12    | 12   | 12    | 9     | 19  | 10  | 10  | 11  | 11    | 7    | 5    | 7   |
| 383 | Galb1-4(Fuca1-3)GlcNAcb1-6(Galb1-3GlcNAcb1-3)Galb1-4Glc-Sp21                                                          | -1    | 6    | 9     | 6     | 15  | 15  | 6   | 5   | 4     | 8    | 11   | 6   |
| 384 | Galb1-4GlcNAcb1-6(Fuca1-4(Fuca1-2Galb1-3)GlcNAcb1-3)Galb1-4Glc-Sp21                                                   | 29    | 29   | -4    | 14    | 14  | 10  | 15  | 9   | 15    | 7    | 15   | 13  |

|     |                                                                                                                          |       |      |       |      |      |     |      |     |       |      |      |     |
|-----|--------------------------------------------------------------------------------------------------------------------------|-------|------|-------|------|------|-----|------|-----|-------|------|------|-----|
| 385 | Galb1-4(Fuca1-3)GlcNAcb1-6(Fuca1-4(Fuca1-2Galb1-3)GlcNAcb1-3)Galb1-4Glc-Sp21                                             | 13    | 5    | 0     | 1    | 9    | 9   | 4    | 5   | 16    | 6    | 4    | 5   |
| 386 | Galb1-3GlcNAcb1-3Galb1-4(Fuca1-3)GlcNAcb1-6(Galb1-3GlcNAcb1-3)Galb1-4Glc-Sp21                                            | 13    | 7    | 23    | 8    | 6    | 2   | 5    | 3   | 2     | 5    | 1    | 1   |
| 387 | Galb1-4GlcNAcb1-6(Galb1-4GlcNAcb1-2)Mana1-6(Galb1-4GlcNAcb1-4(Galb1-4GlcNAcb1-2)Mana1-3)Manb1-4GlcNAcb1-4GlcNAcb-Sp21    | 15    | 9    | 6     | 9    | 6    | 8   | 4    | 3   | 7     | 8    | -1   | 8   |
| 388 | GlcNAcb1-2Mana1-6(GlcNAcb1-4(GlcNAcb1-2)Mana1-3)Manb1-4GlcNAcb1-4GlcNAcb-Sp21                                            | -6    | 7    | 22    | 48   | 12   | 9   | 6    | 15  | 17    | 25   | 18   |     |
| 389 | Fuca1-2Galb1-3GalNAca1-3(Fuca1-2)Galb1-4Glc-Sp0                                                                          | 19    | 13   | 358   | 477  | 6    | 12  | 12   | 5   | 14    | 18   | 6    | 6   |
| 390 | Fuca1-2Galb1-3GalNAca1-3(Fuca1-2)Galb1-4GlcNAcb-Sp0                                                                      | 20    | 10   | 10    | 10   | 19   | 7   | 4    | 2   | 12    | 3    | 3    | 3   |
| 391 | Galb1-3GlcNAcb1-3GalNAca-Sp14                                                                                            | 41    | 7    | 13    | 9    | 9    | 5   | 4    | 9   | 24    | 21   | 11   | 4   |
| 392 | GalNAcb1-4(Neu5Aca2-3)Galb1-4GlcNAcb1-3GalNAca-Sp14                                                                      | 2430  | 698  | 1516  | 311  | 13   | 8   | 9    | 6   | 4038  | 163  | 52   | 8   |
| 393 | GalNAca1-3(Fuca1-2)Galb1-3GalNAca1-3(Fuca1-2)Galb1-4GlcNAcb-Sp0                                                          | 20365 | 1696 | 3874  | 127  | 15   | 9   | 8    | 9   | 2387  | 506  | 202  | 88  |
| 394 | Gala1-3Galb1-3GlcNAcb1-2Mana1-6(Gala1-3Galb1-3GlcNAcb1-2Mana1-3)Manb1-4GlcNAcb1-4GlcNAcb-Sp19                            | 59    | 9    | 314   | 426  | 12   | 4   | 14   | 8   | 46    | 15   | 14   | 5   |
| 395 | Gala1-3Galb1-3(Fuca1-4)GlcNAcb1-2Mana1-6(Gala1-3Galb1-3(Fuca1-4)GlcNAcb1-2Mana1-3)Manb1-4GlcNAcb1-4GlcNAcb-Sp19          | 273   | 29   | 323   | 402  | 30   | 8   | 13   | 4   | 146   | 26   | 52   | 23  |
| 396 | Neu5Aca2-3Galb1-3GlcNAcb1-2Mana1-6(Neu5Aca2-3Galb1-3GlcNAcb1-2Mana1-3)Manb1-4GlcNAcb1-4GlcNAcb-Sp19                      | 46    | 11   | 20    | 12   | 12   | 15  | 10   | 7   | 35    | 3    | 7    | 3   |
| 397 | GlcNAcb1-2Mana1-6(Galb1-4GlcNAcb1-2Mana1-3)Manb1-4GlcNAcb1-4GlcNAcb-Sp12                                                 | 1     | 2    | 7     | 7    | 7    | 7   | 8    | 3   | 0     | 7    | -2   | 4   |
| 398 | Galb1-4GlcNAcb1-2Mana1-6(GlcNAcb1-2Mana1-3)Manb1-4GlcNAcb1-4GlcNAcb-Sp12                                                 | 64    | 5    | 44    | 9    | 3    | 3   | 9    | 9   | 107   | 15   | 22   | 5   |
| 399 | Neu5Aca2-3Galb1-3GlcNAcb1-3GalNAca-Sp14                                                                                  | 24    | 10   | 12    | 2    | 4    | 5   | 11   | 5   | 17    | 5    | 2    | 1   |
| 400 | Fuca1-2Galb1-4GlcNAcb1-3GalNAca-Sp14                                                                                     | 34    | 22   | 9     | 7    | 3    | 6   | 9    | 3   | 39    | 17   | 9    | 9   |
| 401 | Galb1-4(Fuca1-3)GlcNAcb1-3GalNAca-Sp14                                                                                   | 14    | 19   | 185   | 159  | 13   | 8   | 9    | 6   | 17    | 7    | 13   | 6   |
| 402 | GalNAca1-3GalNAcb1-3Gala1-4Galb1-4GlcNAcb-Sp0                                                                            | 780   | 25   | 8852  | 134  | 9    | 7   | 5    | 6   | 8230  | 450  | 984  | 28  |
| 403 | Gala1-4Galb1-3GlcNAcb1-2Mana1-6(Gala1-4Galb1-3GlcNAcb1-2Mana1-3)Manb1-4GlcNAcb1-4GlcNAcb-Sp19                            | 10    | 5    | 12    | 2    | 24   | 14  | 7    | 6   | 17    | 8    | 13   | 11  |
| 404 | Gala1-4Galb1-4GlcNAcb1-2Mana1-6(Gala1-4Galb1-4GlcNAcb1-2Mana1-3)Manb1-4GlcNAcb1-4GlcNAcb-Sp24                            | 25    | 10   | 9     | 6    | 10   | 11  | 11   | 6   | 43    | 15   | 18   | 1   |
| 405 | Gala1-3Galb1-4GlcNAcb1-3GalNAca-Sp14                                                                                     | 9     | 9    | 8     | 8    | 10   | 7   | 4    | 2   | 9     | 4    | 4    | 6   |
| 406 | Galb1-3GlcNAcb1-6Galb1-4GlcNAcb-Sp0                                                                                      | 12    | 3    | 17    | 4    | 1    | 0   | 7    | 5   | 7     | 5    | 16   | 15  |
| 407 | Galb1-3GlcNAca1-6Galb1-4GlcNAcb-Sp0                                                                                      | 21    | 8    | 15    | 6    | 10   | 5   | 14   | 14  | 9     | 12   | 5    | 6   |
| 408 | GalNAcb1-3Gala1-6Galb1-4Glc-Sp8                                                                                          | 19603 | 1765 | 29118 | 1298 | 5310 | 128 | 2770 | 238 | 14435 | 1748 | 6216 | 574 |
| 409 | Gala1-3(Fuca1-2)Galb1-4(Fuca1-3)Glc-Sp21                                                                                 | 16    | 8    | -51   | 104  | 5    | 6   | 5    | 6   | -3    | 16   | 26   | 24  |
| 410 | Galb1-4GlcNAcb1-6(Neu5Aca2-6Galb1-3GlcNAcb1-3)Galb1-4Glc-Sp21                                                            | 5     | 8    | 20    | 17   | -4   | 4   | -1   | 2   | 22    | 25   | 9    | 4   |
| 411 | Galb1-3GalNAcb1-4(Neu5Aca2-8Neu5Aca2-3)Galb1-4Glc-Sp0                                                                    | 9739  | 869  | 4164  | 332  | 9    | 4   | 12   | 13  | 7205  | 593  | 1169 | 153 |
| 412 | Neu5Aca2-3Galb1-3GalNAcb1-4(Neu5Aca2-8Neu5Aca2-3)Galb1-4Glc-Sp0                                                          | 99    | 7    | 23    | 9    | 8    | 13  | 12   | 13  | 71    | 28   | 11   | 8   |
| 413 | Gala1-3(Fuca1-2)Galb1-4GlcNAcb1-3GalNAca-Sp14                                                                            | 31    | 12   | 99    | 126  | 12   | 3   | 4    | 3   | 29    | 11   | 7    | 2   |
| 414 | GalNAca1-3(Fuca1-2)Galb1-4GlcNAcb1-3GalNAca-Sp14                                                                         | 399   | 39   | 767   | 20   | 2    | 6   | 6    | 14  | 297   | 30   | 7    | 8   |
| 415 | GalNAca1-3GalNAcb1-3Gala1-4Galb1-4Glc-Sp0                                                                                | 18646 | 1018 | 6118  | 309  | 22   | 13  | 9    | 4   | 3879  | 83   | 197  | 25  |
| 416 | Fuca1-2Galb1-4(Fuca1-3)GlcNAcb1-3GalNAca-Sp14                                                                            | 49    | 6    | 483   | 189  | 24   | 5   | 12   | 6   | 46    | 15   | 8    | 5   |
| 417 | Gala1-3(Fuca1-2)Galb1-4(Fuca1-3)GlcNAcb1-3GalNAca-Sp14                                                                   | 45    | 28   | 3     | 5    | 10   | 1   | 3    | 8   | 16    | 18   | 14   | 2   |
| 418 | GalNAca1-3(Fuca1-2)Galb1-4(Fuca1-3)GlcNAcb1-3GalNAca-Sp14                                                                | 145   | 22   | 151   | 119  | 12   | 10  | 32   | 39  | 89    | 14   | 14   | 7   |
| 419 | Galb1-4(Fuca1-3)GlcNAcb1-2Mana1-6(Galb1-4(Fuca1-3)GlcNAcb1-2Mana1-3)Manb1-4GlcNAcb1-4(Fuca1-6)GlcNAcb-Sp22               | 40    | 10   | 9     | 19   | 8    | 5   | 21   | 19  | 37    | 12   | 18   | 14  |
| 420 | Fuca1-2Galb1-4GlcNAcb1-2Mana1-6(Fuca1-2Galb1-4GlcNAcb1-2Mana1-3)Manb1-4GlcNAcb1-4(Fuca1-6)GlcNAcb-Sp22                   | 241   | 22   | 162   | 24   | 45   | 16  | 12   | 6   | 219   | 11   | 104  | 21  |
| 421 | GlcNAcb1-2(GlcNAcb1-6)Mana1-6(GlcNAcb1-2Mana1-3)Manb1-4GlcNAcb1-4GlcNAcb-Sp19                                            | 5     | 9    | 9     | 5    | 8    | 8   | 10   | 7   | 13    | 8    | 10   | 10  |
| 422 | Fuca1-2Galb1-3GlcNAcb1-3GalNAca-Sp14                                                                                     | 24    | 16   | 6     | 4    | 5    | 11  | 11   | 6   | 28    | 14   | 6    | 7   |
| 423 | Gala1-3(Fuca1-2)Galb1-3GlcNAcb1-3GalNAca-Sp14                                                                            | 15    | 11   | 1     | 3    | 24   | 11  | 7    | 7   | 29    | 24   | 4    | 1   |
| 424 | GalNAca1-3(Fuca1-2)Galb1-3GlcNAcb1-3GalNAca-Sp14                                                                         | 298   | 35   | 378   | 17   | 16   | 20  | 12   | 11  | 410   | 53   | 20   | 4   |
| 425 | Gala1-3Galb1-3GlcNAcb1-3GalNAca-Sp14                                                                                     | 40    | 7    | 29    | 5    | 11   | 14  | 5    | 3   | 28    | 5    | 7    | 6   |
| 426 | Fuca1-2Galb1-3GlcNAcb1-2Mana1-6(Fuca1-2Galb1-3GlcNAcb1-2Mana1-3)Manb1-4GlcNAcb1-4(Fuca1-6)GlcNAcb-Sp22                   | 196   | 23   | 131   | 21   | 31   | 17  | 15   | 10  | 224   | 17   | 87   | 20  |
| 427 | Gala1-3(Fuca1-2)Galb1-4GlcNAcb1-2Mana1-6(Gala1-3(Fuca1-2)Galb1-4GlcNAcb1-2Mana1-3)Manb1-4GlcNAcb1-4(Fuca1-6)GlcNAcb-Sp22 | 92    | 29   | 60    | 14   | 7    | 7   | 1    | 6   | 61    | 21   | 24   | 3   |
| 428 | Galb1-3GlcNAcb1-6(Galb1-3GlcNAcb1-2)Mana1-6(Galb1-3GlcNAcb1-2Mana1-3)Manb1-4GlcNAcb1-4GlcNAcb-Sp19                       | 23    | 23   | -197  | 47   | -14  | 21  | -66  | 26  | -99   | 22   | -28  | 11  |
| 429 | Galb1-4GlcNAcb1-6(Fuca1-2Galb1-3GlcNAcb1-3)Galb1-4Glc-Sp21                                                               | 4     | 6    | -1    | 4    | 6    | 5   | 6    | 7   | 11    | 2    | 4    | 9   |
| 430 | Fuca1-3GlcNAcb1-6(Galb1-4GlcNAcb1-3)Galb1-4Glc-Sp21                                                                      | 10    | 5    | -72   | 85   | 17   | 5   | 11   | 6   | 8     | 10   | 16   | 8   |
| 431 | GlcNAcb1-2Mana1-6(GlcNAcb1-4)(GlcNAcb1-2)Mana1-3)Manb1-4GlcNAcb1-4GlcNAcb-Sp21                                           | 13    | 8    | 8     | 10   | 5    | 3   | 2    | 11  | 15    | 11   | 3    | 7   |
| 432 | GlcNAcb1-2Mana1-6(GlcNAcb1-4)(GlcNAcb1-2)Mana1-3)Manb1-4GlcNAcb1-4GlcNAcb-Sp21                                           | 142   | 91   | 6     | 8    | 32   | 14  | 3    | 7   | 41    | 16   | 13   | 7   |
| 433 | GlcNAcb1-6(GlcNAcb1-2)Mana1-6(GlcNAcb1-4)(GlcNAcb1-2)Mana1-3)Manb1-4GlcNAcb1-4GlcNAcb-Sp21                               | 7     | 3    | 6     | 2    | 2    | 3   | 6    | 5   | 11    | 5    | 14   | 13  |
| 434 | GlcNAcb1-6(GlcNAcb1-2)Mana1-6(GlcNAcb1-4)(GlcNAcb1-2)Mana1-3)Manb1-4GlcNAcb1-4GlcNAcb-Sp21                               | 9     | 1    | 10    | 4    | 2    | 7   | 10   | 8   | 4     | 1    | 5    | 4   |
| 435 | Galb1-4GlcNAcb1-2Mana1-6(GlcNAcb1-4)(Galb1-4GlcNAcb1-2Mana1-3)Manb1-4GlcNAcb1-4GlcNAcb-Sp21                              | 4     | 4    | 8     | 6    | 12   | 9   | 4    | 3   | 13    | 9    | 5    | 7   |
| 436 | Galb1-4GlcNAcb1-2Mana1-6(GlcNAcb1-4)(Galb1-4GlcNAcb1-2)Mana1-3)Manb1-4GlcNAcb1-4GlcNAcb-Sp21                             | 10    | 8    | 1     | 6    | 4    | 8   | 12   | 4   | 9     | 8    | 4    | 4   |
| 437 | Galb1-4GlcNAcb1-6(Galb1-4GlcNAcb1-2)Mana1-6(GlcNAcb1-4)(Galb1-4GlcNAcb1-2)Mana1-3)Manb1-4GlcNAcb1-4GlcNAcb-Sp21          | 12    | 3    | 5     | 3    | 8    | 5   | 10   | 1   | 9     | 3    | 1    | 9   |
| 438 | Galb1-4GlcNAcb1-6(Galb1-4GlcNAcb1-2)Mana1-6(GlcNAcb1-4)(Galb1-4GlcNAcb1-2)Mana1-3)Manb1-4GlcNAcb1-4GlcNAcb-Sp21          | -64   | 12   | -76   | 7    | -10  | 16  | -14  | 7   | -11   | 34   | -38  | 20  |
| 439 | Galb1-4Galb-Sp10                                                                                                         | -33   | 18   | -433  | 281  | -20  | 5   | -31  | 9   | -55   | 23   | -22  | 5   |
| 440 | Galb1-6Galb-Sp10                                                                                                         | -45   | 37   | 178   | 252  | 7    | 11  | 9    | 3   | -28   | 14   | -16  | 7   |
| 441 | Neu5Aca2-3Galb1-4GlcNAcb1-3Galb-Sp8                                                                                      | -140  | 109  | -4146 | 1824 | -10  | 9   | -43  | 31  | -2120 | 316  | -557 | 92  |
| 442 | GalNAcb1-6GalNAcb-Sp8                                                                                                    | 26    | 11   | 13    | 5    | 5    | 4   | 6    | 8   | 18    | 15   | 14   | 14  |
| 443 | (6S)Galb1-3GlcNAcb-Sp0                                                                                                   | 97    | 30   | 19    | 11   | 13   | 8   | 5    | 55  | 20    | 8    | 6    | 6   |

|     |                                                                                                                                                                            |       |      |        |      |       |      |       |      |       |      |       |      |
|-----|----------------------------------------------------------------------------------------------------------------------------------------------------------------------------|-------|------|--------|------|-------|------|-------|------|-------|------|-------|------|
| 444 | (6S)Galb1-3(6S)GlcNAc-Sp0                                                                                                                                                  | -42   | 17   | -209   | 74   | -37   | 7    | -19   | 18   | -121  | 83   | -25   | 13   |
| 445 | Fuca1-2Galb1-4-GlcNAcb1-2Mana1-6(Fuca1-2Galb1-4GlcNAcb1-2(Fuca1-2Galb1-4GlcNAcb1-4)Mana1-3)Manb1-4GlcNAcb1-4GlcNAcb-Sp12                                                   | 36    | 11   | -134   | 44   | 1     | 17   | -22   | 11   | -72   | 15   | -14   | 17   |
| 446 | Fuca1-2Galb1-4(Fuca1-3)GlcNAcb1-2Mana1-6(Fuca1-2Galb1-4(Fuca1-3)GlcNAcb1-4(Fuca1-2Galb1-4(Fuca1-3)GlcNAcb1-2)Mana1-3)Manb1-4GlcNAcb1-4GlcNAcb-Sp12                         | 192   | 25   | 109    | 42   | 32    | 2    | 13    | 4    | 145   | 35   | 55    | 12   |
| 447 | Galb1-4(Fuca1-3)GlcNAcb1-6GalNAc-Sp14                                                                                                                                      | 4608  | 113  | 5365   | 414  | 20    | 11   | 13    | 4    | 6238  | 365  | 1315  | 156  |
| 448 | Galb1-4GlcNAcb1-2Mana-Sp0                                                                                                                                                  | 140   | 34   | 495    | 64   | 21    | 6    | 5     | 4    | 1153  | 53   | 125   | 39   |
| 449 | Fuca1-2Galb1-4GlcNAcb1-6(Fuca1-2Galb1-4GlcNAcb1-3)GalNAc-Sp14                                                                                                              | 445   | 14   | 189    | 20   | 21    | 5    | 12    | 7    | 278   | 21   | 66    | 13   |
| 450 | Gala1-3(Fuca1-2)Galb1-4GlcNAcb1-6(Gala1-3(Fuca1-2)Galb1-4GlcNAcb1-3)GalNAc-Sp14                                                                                            | 160   | 64   | 34     | 7    | 66    | 39   | 13    | 13   | 260   | 35   | 17    | 12   |
| 451 | GalNAca1-3(Fuca1-2)Galb1-4GlcNAcb1-6(GalNAca1-3(Fuca1-2)Galb1-4GlcNAcb1-3)GalNAc-Sp14                                                                                      | 385   | 45   | 4353   | 60   | 1     | 7    | 3     | 3    | 4272  | 312  | 189   | 41   |
| 452 | Neu5Aca2-8Neu5Aca2-3Galb1-3GalNAcb1-4(Neu5Aca2-8Neu5Aca2-3)Galb1-4Glc-Sp0                                                                                                  | 18    | 10   | 9      | 3    | 7     | 6    | 18    | 6    | 24    | 9    | 20    | 9    |
| 453 | GalNAcb1-4Galb1-4Glc-Sp0                                                                                                                                                   | 140   | 60   | -3     | 30   | 12    | 10   | 7     | 5    | 232   | 29   | 7     | 7    |
| 454 | GalNAca1-3(Fuca1-2)Galb1-4GlcNAcb1-2Mana1-6(GalNAca1-3(Fuca1-2)Galb1-4GlcNAcb1-2Mana1-3)Manb1-4GlcNAcb1-4(Fuca1-6)GlcNAcb-Sp22                                             | 148   | 58   | 137    | 46   | 5     | 8    | 26    | 11   | 1763  | 357  | -15   | 190  |
| 455 | Gala1-3(Fuca1-2)Galb1-3GlcNAcb1-2Mana1-6(Gala1-3(Fuca1-2)Galb1-3GlcNAcb1-2Mana1-3)Manb1-4GlcNAcb1-4(Fuca1-6)GlcNAcb-Sp22                                                   | 38    | 23   | -24    | 30   | 12    | 8    | 13    | 3    | 16    | 10   | 0     | 4    |
| 456 | Neu5Aca2-6Galb1-4GlcNAcb1-6(Fuca1-2Galb1-3GlcNAcb1-3)Galb1-4Glc-Sp21                                                                                                       | 30    | 21   | 11     | 6    | 6     | 8    | 2     | 10   | 18    | 9    | 7     | 11   |
| 457 | GalNAca1-3(Fuca1-2)Galb1-3GlcNAcb1-2Mana1-6(GalNAca1-3(Fuca1-2)Galb1-3GlcNAcb1-2Mana1-3)Manb1-4GlcNAcb1-4(Fuca1-6)GlcNAcb-Sp22                                             | 6238  | 590  | 881    | 45   | -8    | 8    | -8    | 17   | 742   | 177  | -3    | 31   |
| 458 | Galb1-4GlcNAcb1-6(Galb1-4GlcNAcb1-2)Mana1-6(Galb1-4GlcNAcb1-2Mana1-3)Manb1-4GlcNAcb1-4GlcNAcb-Sp19                                                                         | 45    | 20   | 5      | 3    | 17    | 15   | 5     | 4    | 19    | 9    | 15    | 9    |
| 459 | Neu5Aca2-3Galb1-4GlcNAcb1-2Mana1-6(GlcNAcb1-4)(Neu5Aca2-3Galb1-4GlcNAcb1-2Mana1-3)Manb1-4GlcNAcb1-4GlcNAcb-Sp21                                                            | 22    | 2    | 9      | 7    | 9     | 5    | 6     | 2    | 15    | 6    | 8     | 3    |
| 460 | Neu5Aca2-3Galb1-4GlcNAcb1-4Mana1-6(GlcNAcb1-4)(Neu5Aca2-3Galb1-4GlcNAcb1-4)(Neu5Aca2-3Galb1-4GlcNAcb1-2)Mana1-3)Manb1-4GlcNAcb1-4GlcNAcb-Sp21                              | 13    | 9    | 15     | 18   | 8     | 3    | 8     | 7    | 14    | 6    | 11    | 6    |
| 461 | Neu5Aca2-3Galb1-4GlcNAcb1-6(Neu5Aca2-3Galb1-4GlcNAcb1-2)Mana1-6(GlcNAcb1-4)(Neu5Aca2-3Galb1-4GlcNAcb1-2)Mana1-3)Manb1-4GlcNAcb1-4GlcNAcb-Sp21                              | 18    | 21   | 6      | 2    | 9     | 8    | 18    | 26   | 18    | 6    | 13    | 7    |
| 462 | Neu5Aca2-3Galb1-4GlcNAcb1-6(Neu5Aca2-3Galb1-4GlcNAcb1-2)Mana1-6(GlcNAcb1-4)(Neu5Aca2-3Galb1-4GlcNAcb1-4)(Neu5Aca2-3Galb1-4GlcNAcb1-2)Mana1-3)Manb1-4GlcNAcb1-4GlcNAcb-Sp21 | 5     | 6    | 6      | 6    | 5     | 5    | 10    | 8    | 21    | 10   | 6     | 6    |
| 463 | Neu5Aca2-6Galb1-4GlcNAcb1-2Mana1-6(GlcNAcb1-4)(Neu5Aca2-6Galb1-4GlcNAcb1-2)Mana1-3)Manb1-4GlcNAcb1-4GlcNAcb-Sp21                                                           | 32    | 11   | 5      | 5    | 10    | 12   | 2     | 5    | 22    | 2    | 14    | 14   |
| 464 | Neu5Aca2-6Galb1-4GlcNAcb1-4Mana1-6(GlcNAcb1-4)(Neu5Aca2-6Galb1-4GlcNAcb1-4)(Neu5Aca2-6Galb1-4GlcNAcb1-2)Mana1-3)Manb1-4GlcNAcb1-4GlcNAcb-Sp21                              | -1137 | 145  | -12055 | 1384 | -15   | 11   | 4     | 7    | -2088 | 967  | -309  | 220  |
| 465 | Neu5Aca2-6Galb1-4GlcNAcb1-6(Neu5Aca2-6Galb1-4GlcNAcb1-2)Mana1-6(GlcNAcb1-4)(Neu5Aca2-6Galb1-4GlcNAcb1-2)Mana1-3)Manb1-4GlcNAcb1-4GlcNAcb-Sp21                              | 19    | 11   | 7      | 2    | 12    | 17   | 2     | 8    | 9     | 14   | 7     | 8    |
| 466 | Neu5Aca2-6Galb1-4GlcNAcb1-6(Neu5Aca2-6Galb1-4GlcNAcb1-2)Mana1-6(GlcNAcb1-4)(Neu5Aca2-6Galb1-4GlcNAcb1-4)(Neu5Aca2-6Galb1-4GlcNAcb1-2)Mana1-3)Manb1-4GlcNAcb1-4GlcNAcb-Sp21 | -332  | 17   | -7002  | 2942 | -61   | 20   | 4     | 2    | -4320 | 404  | -728  | 178  |
| 467 | Gala1-3(Fuca1-2)Galb1-3GalNAc-Sp8                                                                                                                                          | 42    | 11   | -18    | 56   | 5     | 6    | 16    | 9    | 26    | 21   | 8     | 12   |
| 468 | Gala1-3(Fuca1-2)Galb1-3GalNAc-Sp8                                                                                                                                          | 19    | 8    | 38     | 15   | 6     | 7    | 14    | 10   | 29    | 5    | 15    | 6    |
| 469 | Gica1-6Gica1-6Gica1-6Glc-Sp10                                                                                                                                              | 12    | 7    | 5      | 8    | 7     | 10   | 2     | 8    | 3     | 5    | 7     | 5    |
| 470 | Gica1-4Gica1-4Gica1-4Glc-Sp10                                                                                                                                              | 15    | 2    | 9      | 4    | 14    | 8    | 9     | 10   | 12    | 9    | 4     | 1    |
| 471 | Neu5Aca2-3Galb1-4GlcNAcb1-6(Neu5Aca2-3Galb1-4GlcNAcb1-3)GalNAc-Sp14                                                                                                        | -117  | 58   | -3309  | 1169 | 0     | 6    | -35   | 21   | -635  | 231  | -299  | 64   |
| 472 | Fuca1-2Galb1-4(Fuca1-3)GlcNAcb1-2Mana1-6(Fuca1-2Galb1-4(Fuca1-3)GlcNAcb1-2Mana1-3)Manb1-4GlcNAcb1-4(Fuca1-6)GlcNAcb-Sp24                                                   | 83    | 31   | 57     | 12   | 11    | 5    | 12    | 10   | 95    | 41   | 11    | 11   |
| 473 | Fuca1-2Galb1-3(Fuca1-4)GlcNAcb1-2Mana1-6(Fuca1-2Galb1-3(Fuca1-4)GlcNAcb1-2Mana1-3)Manb1-4GlcNAcb1-4(Fuca1-6)GlcNAcb1-4(Fuca1-6)GlcNAcb-Sp19                                | 74    | 21   | 56     | 41   | 20    | 8    | 6     | 4    | 85    | 23   | 27    | 16   |
| 474 | Neu5Aca2-3Galb1-3GlcNAcb1-6(Neu5Aca2-3Galb1-3GlcNAcb1-2)Mana1-6(Neu5Aca2-3Galb1-3GlcNAcb1-2)Mana1-3)Manb1-4GlcNAcb1-4GlcNAcb-Sp19                                          | 108   | 6    | 45     | 8    | 4     | 6    | 5     | 3    | 73    | 9    | 13    | 6    |
| 475 | GlcNAcb1-6(GlcNAcb1-2)Mana1-6(GlcNAcb1-2)Mana1-3)Manb1-4GlcNAcb1-4(Fuca1-6)GlcNAcb-Sp24                                                                                    | 4     | 5    | -52    | 108  | 8     | 3    | 19    | 9    | 0     | 6    | 10    | 7    |
| 476 | Galb1-3GlcNAcb1-2Mana1-6(GlcNAcb1-4)(Galb1-3GlcNAcb1-2)Mana1-3)Manb1-4GlcNAcb1-4GlcNAcb-Sp21                                                                               | 14    | 6    | 27     | 20   | 17    | 7    | 11    | 7    | 17    | 5    | 23    | 7    |
| 477 | Neu5Aca2-6Galb1-4GlcNAcb1-6(Galb1-3GlcNAcb1-3)Galb1-4Glc-Sp21                                                                                                              | -6    | 6    | -50    | 28   | 7     | 17   | 10    | 10   | -21   | 14   | -4    | 7    |
| 478 | Neu5Aca2-3Galb1-4GlcNAcb1-2Mana-Sp0                                                                                                                                        | 392   | 41   | 180    | 108  | 42    | 10   | 29    | 7    | 388   | 8    | 136   | 18   |
| 479 | Neu5Aca2-3Galb1-4GlcNAcb1-6GalNAc-Sp14                                                                                                                                     | 14378 | 1523 | 34032  | 1421 | 10949 | 5984 | 18005 | 1024 | 24486 | 6172 | 4700  | 147  |
| 480 | Neu5Aca2-6Galb1-4GlcNAcb1-6GalNAc-Sp14                                                                                                                                     | 128   | 6    | 59     | 8    | 11    | 8    | 10    | 10   | 77    | 25   | 33    | 3    |
| 481 | Neu5Aca2-6Galb1-4GlcNAcb1-6(Neu5Aca2-6Galb1-4GlcNAcb1-3)GalNAc-Sp14                                                                                                        | 596   | 36   | 224    | 49   | 25    | 12   | 6     | 3    | 263   | 23   | 56    | 12   |
| 482 | Neu5Aca2-6Galb1-4GlcNAcb1-2Mana1-6(Neu5Aca2-6Galb1-4GlcNAcb1-2)Mana1-3)Manb1-4GlcNAcb1-4(Fuca1-6)GlcNAcb-Sp24                                                              | -65   | 20   | -77    | 33   | 3     | 2    | 16    | 3    | -23   | 21   | 0     | 5    |
| 483 | Neu5Aca2-3Galb1-4GlcNAcb1-2Mana1-6(Neu5Aca2-3Galb1-4GlcNAcb1-2)Mana1-3)Manb1-4GlcNAcb1-4(Fuca1-6)GlcNAcb-Sp24                                                              | 34    | 13   | 23     | 7    | 13    | 9    | 11    | 5    | 43    | 18   | 8     | 9    |
| 484 | Mana1-6(Mana1-3)Manb1-4GlcNAcb1-4(Fuca1-6)GlcNAcb-Sp19                                                                                                                     | 31    | 10   | 11     | 2    | 13    | 5    | 5     | 3    | 18    | 8    | 21    | 5    |
| 485 | Galb1-4GlcNAcb1-6(Galb1-4GlcNAcb1-2)Mana1-6(Galb1-4GlcNAcb1-2)Mana1-3)Manb1-4GlcNAcb1-4(Fuca1-6)GlcNAcb-Sp24                                                               | 12    | 7    | 13     | 5    | 11    | 2    | 15    | 9    | 16    | 9    | 18    | 8    |
| 486 | Neu5Aca2-3Galb1-3GlcNAcb1-2Mana1-6(GlcNAcb1-4)(Neu5Aca2-3Galb1-3GlcNAcb1-2)Mana1-3)Manb1-4GlcNAcb1-4GlcNAcb-Sp21                                                           | 36    | 11   | 3      | 5    | 9     | 2    | 6     | 3    | 15    | 2    | 14    | 7    |
| 487 | Neu5Aca2-6Galb1-4GlcNAcb1-6(Fuca1-2Galb1-4(Fuca1-3)GlcNAcb1-3)Galb1-4Glc-Sp21                                                                                              | 5     | 5    | -34    | 46   | 6     | 2    | 2     | 2    | 14    | 14   | 18    | 11   |
| 488 | Galb1-3GlcNAcb1-6GalNAc-Sp14                                                                                                                                               | 28774 | 1447 | 29058  | 1688 | 12990 | 3229 | 11643 | 1540 | 8890  | 2348 | 13051 | 1033 |
| 489 | Gala1-3Galb1-3GlcNAcb1-6GalNAc-Sp14                                                                                                                                        | 19291 | 4418 | 30470  | 1975 | 19977 | 4677 | 18669 | 546  | 14289 | 5426 | 7725  | 1909 |
| 490 | Galb1-3(Fuca1-4)GlcNAcb1-6GalNAc-Sp14                                                                                                                                      | 16898 | 1339 | 8292   | 1080 | 313   | 54   | 28    | 18   | 8734  | 521  | 3007  | 367  |
| 491 | Neu5Aca2-3Galb1-3GlcNAcb1-6GalNAc-Sp14                                                                                                                                     | 5470  | 326  | 37506  | 7915 | 1549  | 121  | 12108 | 1729 | 13060 | 1161 | 3469  | 842  |
| 492 | (3S)Galb1-3(Fuca1-4)GlcNAcb-Sp0                                                                                                                                            | 30    | 13   | 7      | 4    | 13    | 6    | 1     | 6    | 21    | 16   | 16    | 10   |
| 493 | Galb1-4(Fuca1-3)GlcNAcb1-6(Neu5Aca2-6(Neu5Aca2-3Galb1-3)GlcNAcb1-3)Galb1-4Glc-Sp21                                                                                         | 27    | 5    | -20    | 49   | 16    | 8    | 6     | 4    | 23    | 7    | 4     | 3    |
| 494 | Fuca1-2Galb1-4GlcNAcb1-6GalNAc-Sp14                                                                                                                                        | 7970  | 1342 | 33601  | 1620 | 16051 | 4184 | 13768 | 2139 | 24889 | 3535 | 3297  | 706  |
| 495 | Gala1-3Galb1-4GlcNAcb1-6GalNAc-Sp14                                                                                                                                        | 12759 | 765  | 33787  | 1779 | 12567 | 3595 | 18637 | 945  | 23891 | 4719 | 4426  | 125  |
| 496 | Galb1-4(Fuca1-3)GlcNAcb1-2Mana-Sp0                                                                                                                                         | 12    | 5    | 21     | 26   | 13    | 12   | 5     | 3    | 22    | 13   | 7     | 14   |



|     |                                                                                                                                                                  |       |      |       |      |       |      |       |     |       |      |      |      |
|-----|------------------------------------------------------------------------------------------------------------------------------------------------------------------|-------|------|-------|------|-------|------|-------|-----|-------|------|------|------|
| 497 | Fuca1-2(6S)Galb1-3GlcNAcb-Sp0                                                                                                                                    | 32    | 8    | 22    | 3    | 4     | 5    | 4     | 1   | 28    | 14   | 11   | 5    |
| 498 | Gala1-3(Fuca1-2)Galb1-4GlcNAcb1-6GalNaca-Sp14                                                                                                                    | 16    | 7    | 0     | 7    | -2    | 2    | 7     | 3   | 11    | 14   | 0    | 4    |
| 499 | Fuca1-2Galb1-4GlcNAcb1-2Mana-Sp0                                                                                                                                 | 18    | 9    | 10    | 6    | 6     | 7    | 8     | 2   | 16    | 4    | 13   | 13   |
| 500 | Fuca1-2Galb1-3(6S)GlcNAcb-Sp0                                                                                                                                    | 800   | 39   | 462   | 15   | 53    | 6    | 12    | 11  | 657   | 54   | 213  | 8    |
| 501 | Fuca1-2(6S)Galb1-3(6S)GlcNAcb-Sp0                                                                                                                                | 653   | 19   | 499   | 38   | 81    | 28   | 13    | 8   | 693   | 66   | 238  | 25   |
| 502 | Neu5Aca2-6GalNAcb1-4(6S)GlcNAcb-Sp8                                                                                                                              | 749   | 113  | 8123  | 609  | 2     | 5    | 7     | 2   | 6674  | 829  | 237  | 29   |
| 503 | GalNAcb1-4(Fuca1-3)(6S)GlcNAcb-Sp8                                                                                                                               | 12390 | 918  | 25648 | 1188 | 566   | 48   | 12    | 5   | 12592 | 1472 | 3978 | 2666 |
| 504 | (3S)GalNAcb1-4(Fuca1-3)GlcNAcb-Sp8                                                                                                                               | 70    | 5    | 199   | 248  | 11    | 13   | 17    | 8   | 29    | 8    | 13   | 7    |
| 505 | Fuca1-2Galb1-3GlcNAcb1-6(Fuca1-2Galb1-3GlcNAcb1-3)GalNAca-Sp14                                                                                                   | 89    | 33   | 45    | 21   | 5     | 1    | 23    | 8   | 52    | 17   | 6    | 12   |
| 506 | GalNAca1-3(Fuca1-2)Galb1-3GlcNAcb1-6GalNAca-Sp14                                                                                                                 | 18906 | 893  | 26267 | 1657 | 17265 | 3151 | 12561 | 533 | 19852 | 4411 | 6413 | 318  |
| 507 | GlcNAcb1-6(GlcNAcb1-2)Mana1-6(GlcNAcb1-4)(GlcNAcb1-4)(GlcNAcb1-2)Manb1-4GlcNAcb1-4(Fuca1-6)GlcNAcb-Sp21                                                          | 13    | 12   | 5     | 1    | 12    | 10   | 7     | 8   | -10   | 11   | 2    | 1    |
| 508 | Galb1-4GlcNAcb1-6(Galb1-4GlcNAcb1-2)Mana1-6(GlcNAcb1-4)Galb1-4GlcNAcb1-4(Galb1-4GlcNAcb1-2)Mana1-3)Manb1-4GlcNAcb1-4(Fuca1-6)GlcNAcb-Sp21                        | 1     | 4    | 6     | 3    | 10    | 5    | 9     | 7   | 6     | 5    | 8    | 1    |
| 509 | Galb1-3GlcNAca1-3Galb1-4GlcNAcb-Sp8                                                                                                                              | 12    | 7    | -1    | 3    | 11    | 7    | 2     | 3   | 4     | 7    | -2   | 5    |
| 510 | Galb1-3(6S)GlcNAcb-Sp8                                                                                                                                           | 4     | 6    | 5     | 7    | 5     | 4    | 6     | 2   | 31    | 9    | 12   | 13   |
| 511 | (6S)(4S)GalNAcb1-4GlcNAcb-Sp8                                                                                                                                    | 17    | 4    | 9     | 6    | 11    | 2    | 9     | 3   | 13    | 3    | 9    | 5    |
| 512 | (6S)GalNAcb1-4GlcNAcb-Sp8                                                                                                                                        | 10499 | 2512 | 48863 | 3880 | 1771  | 115  | 74    | 11  | 14951 | 8813 | 4256 | 479  |
| 513 | (3S)GalNAcb1-4(3S)GlcNAcb-Sp8                                                                                                                                    | 23    | 5    | 12    | 3    | 8     | 3    | 25    | 14  | 48    | 26   | 12   | 8    |
| 514 | GalNAcb1-4(6S)GlcNAcb-Sp8                                                                                                                                        | 4062  | 301  | 31705 | 6021 | 3048  | 788  | 141   | 21  | 11725 | 859  | 2441 | 192  |
| 515 | (3S)GalNAcb1-4GlcNAcb-Sp8                                                                                                                                        | 10    | 6    | 48    | 82   | 10    | 4    | 8     | 8   | 6     | 25   | 23   | 10   |
| 516 | (4S)GalNAcb-Sp10                                                                                                                                                 | 5     | 4    | 2     | 3    | 6     | 4    | -3    | 4   | 5     | 6    | 2    | 11   |
| 517 | Galb1-4(6P)GlcNAcb-Sp0                                                                                                                                           | 9     | 11   | 4     | 3    | 10    | 12   | 4     | 3   | 17    | 15   | 3    | 8    |
| 518 | (6P)Galb1-4GlcNAcb-Sp0                                                                                                                                           | 2     | 5    | 7     | 5    | 5     | 3    | 6     | 5   | 13    | 20   | 12   | 4    |
| 519 | GalNAca1-3(Fuca1-2)Galb1-4GlcNAcb1-6GalNAcb-Sp14                                                                                                                 | 11834 | 1125 | 43374 | 4868 | 1508  | 381  | 16750 | 841 | 9770  | 841  | 3312 | 112  |
| 520 | Neu5Aca2-6Galb1-4GlcNAcb1-2Man-Sp0                                                                                                                               | -105  | 27   | -81   | 9    | -6    | 10   | 4     | 5   | -49   | 18   | -14  | 8    |
| 521 | Gala1-3Galb1-4GlcNAcb1-2Mana-Sp0                                                                                                                                 | 15    | 19   | -35   | 30   | 7     | 6    | 9     | 6   | 4     | 5    | -5   | 6    |
| 522 | Gala1-3(Fuca1-2)Galb1-4GlcNAcb1-2Mana-Sp0                                                                                                                        | 19    | 13   | 10    | 21   | 3     | 6    | 8     | 3   | 20    | 17   | 10   | 9    |
| 523 | GalNAca1-3(Fuca1-2)Galb1-4GlcNAcb1-2Mana-Sp0                                                                                                                     | 852   | 70   | 4789  | 339  | 8     | 7    | 5     | 10  | 6353  | 295  | 494  | 57   |
| 524 | Galb1-3GlcNAcb1-2Mana-Sp0                                                                                                                                        | 43    | 21   | -12   | 48   | 4     | 5    | 12    | 14  | 19    | 10   | 6    | 6    |
| 525 | Gala1-3(Fuca1-2)Galb1-3GlcNAcb1-6GalNAcb-Sp14                                                                                                                    | 17114 | 1513 | 32323 | 2463 | 4634  | 804  | 2404  | 239 | 26305 | 2206 | 3953 | 132  |
| 526 | Neu5Aca2-3Galb1-3GlcNAcb1-2Mana-Sp0                                                                                                                              | 14    | 11   | 203   | 252  | -2    | 7    | 4     | 12  | 12    | 4    | 5    | 6    |
| 527 | Gala1-3Galb1-3GlcNAcb1-2Mana-Sp0                                                                                                                                 | 50    | 7    | 20    | 3    | 11    | 7    | 7     | 5   | 21    | 12   | 19   | 7    |
| 528 | GalNAcb1-4GlcNAcb1-2Mana-Sp0                                                                                                                                     | 11054 | 659  | 33628 | 1466 | 7482  | 990  | 164   | 17  | 22852 | 3411 | 9224 | 943  |
| 529 | Neu5Aca2-3Galb1-3GlcNAcb1-4Galb1-4Glc-Sp0                                                                                                                        | 19    | 6    | 4     | 2    | 5     | 6    | 4     | 4   | 14    | 8    | 8    | 10   |
| 530 | GlcNAcb1-2 Mana1-6(GlcNAcb1-4)(GlcNAcb1-2)Manb1-4GlcNAcb1-4(Fuca1-6)GlcNAcb-Sp21                                                                                 | 5     | 6    | -58   | 63   | 0     | 8    | 10    | 1   | 24    | 17   | 5    | 5    |
| 531 | Galb1-4GlcNAcb1-2 Mana1-6(GlcNAcb1-4)(Galb1-4GlcNAcb1-2)Manb1-4GlcNAcb1-4(Fuca1-6)GlcNAcb-Sp21                                                                   | 14    | 10   | 3     | 8    | 12    | 10   | 3     | 6   | -1    | 14   | 7    | 3    |
| 532 | Galb1-4GlcNAcb1-2 Mana1-6(Galb1-4GlcNAcb1-4)(Galb1-4GlcNAcb1-2)Manb1-4GlcNAcb1-4(Fuca1-6)GlcNAcb-Sp21                                                            | 13    | 8    | 20    | 8    | 4     | 5    | -3    | 3   | 4     | 17   | 0    | 5    |
| 533 | Fuca1-4(Galb1-3)GlcNAcb1-2 Mana-Sp0                                                                                                                              | 375   | 55   | 780   | 411  | 20    | 6    | 14    | 15  | 348   | 30   | 39   | 28   |
| 534 | Neu5Aca2-3Galb1-4(Fuca1-3)GlcNAcb1-2Mana-Sp0                                                                                                                     | 178   | 11   | 35    | 7    | 49    | 10   | 178   | 4   | 1     | 77   | 11   | 15   |
| 535 | GlcNAcb1-3Galb1-4GlcNAcb1-6(GlcNAcb1-3)Galb1-4GlcNAcb-Sp0                                                                                                        | 24    | 14   | 8     | 2    | 14    | 10   | 6     | 7   | 31    | 33   | 12   | 3    |
| 536 | GalNAca1-3(Fuca1-2)Galb1-3GalNAcb1-3Gala1-4Galb1-4Glc-Sp21                                                                                                       | 234   | 37   | 1486  | 297  | 6     | 5    | 11    | 8   | 1670  | 331  | 23   | 17   |
| 537 | Gala1-3(Fuca1-2)Galb1-3GalNAcb1-3Gala1-4Galb1-4Glc-Sp21                                                                                                          | 9     | 11   | 457   | 527  | 7     | 3    | 5     | 5   | 4     | 17   | 4    | 3    |
| 538 | Galb1-3GalNAcb1-3Gal-Sp21                                                                                                                                        | 33    | 15   | 9     | 8    | 13    | 2    | 6     | 8   | 32    | 20   | 9    | 5    |
| 539 | GlcNAcb1-3Galb1-4GlcNAcb1-2Mana1-6(GlcNAcb1-3Galb1-4GlcNAcb1-2)Manb1-4GlcNAcb1-4GlcNAcb-Sp12                                                                     | 9     | 6    | 4     | 5    | 7     | 3    | -2    | 2   | 4     | 5    | 6    | 13   |
| 540 | GlcNAcb1-3Galb1-4GlcNAcb1-2Mana1-6(GlcNAcb1-3Galb1-4GlcNAcb1-2)Manb1-4GlcNAcb1-4GlcNAcb-Sp25                                                                     | 34    | 28   | 9     | 5    | 16    | 13   | 13    | 7   | 34    | 10   | 7    | 9    |
| 541 | Galb1-4GlcNAcb1-3Galb1-4GlcNAcb1-2Mana1-6(Galb1-4GlcNAcb1-3Galb1-4GlcNAcb1-2)Manb1-4GlcNAcb1-4GlcNAcb-Sp12                                                       | 142   | 18   | 21    | 15   | 37    | 20   | 19    | 11  | 198   | 19   | 17   | 6    |
| 542 | Galb1-4GlcNAcb1-3Galb1-4GlcNAcb1-2Mana1-6(Galb1-4GlcNAcb1-3Galb1-4GlcNAcb1-2)Manb1-4GlcNAcb1-4GlcNAcb-Sp24                                                       | 19    | 17   | -20   | 33   | -17   | 21   | 18    | 14  | 14    | 14   | -7   | 6    |
| 543 | Neu5Gca2-3Galb1-4GlcNAcb1-3Galb1-4GlcNAcb1-2Mana1-6(Neu5Gca2-3Galb1-4GlcNAcb1-3Galb1-4GlcNAcb1-2)Manb1-4GlcNAcb1-4GlcNAcb-Sp24                                   | 20    | 4    | 30    | 13   | 9     | 0    | 16    | 10  | 18    | 10   | 13   | 6    |
| 544 | Fuca1-2Galb1-4GlcNAcb1-3Galb1-4GlcNAcb1-2Mana1-6(Fuca1-2Galb1-4GlcNAcb1-3Galb1-4GlcNAcb1-2)Manb1-4GlcNAcb1-4GlcNAcb-Sp24                                         | 63    | 7    | 63    | 7    | 10    | 6    | 14    | 7   | 85    | 11   | 36   | 2    |
| 545 | GlcNAcb1-3Galb1-4GlcNAcb1-3Galb1-4GlcNAcb1-2Mana1-6(GlcNAcb1-3Galb1-4GlcNAcb1-3Galb1-4GlcNAcb1-2)Manb1-4GlcNAcb1-4GlcNAcb-Sp12                                   | 75    | 29   | 21    | 3    | 25    | 7    | 13    | 6   | 93    | 23   | 15   | 7    |
| 546 | GlcNAcb1-3Galb1-4GlcNAcb1-3Galb1-4GlcNAcb1-2Mana1-6(GlcNAcb1-3Galb1-4GlcNAcb1-3Galb1-4GlcNAcb1-2)Manb1-4GlcNAcb1-4GlcNAcb-Sp25                                   | 61    | 7    | 201   | 138  | 5     | 7    | 9     | 8   | 49    | 7    | 26   | 15   |
| 547 | Galb1-4GlcNAcb1-3Galb1-4GlcNAcb1-3Galb1-4GlcNAcb1-2Mana1-6(Galb1-4GlcNAcb1-3Galb1-4GlcNAcb1-3Galb1-4GlcNAcb1-2)Manb1-4GlcNAcb1-4GlcNAcb-Sp12                     | 175   | 41   | 135   | 136  | 8     | 3    | 7     | 6   | 63    | 7    | 8    | 5    |
| 548 | Galb1-4GlcNAcb1-3Galb1-4GlcNAcb1-3Galb1-4GlcNAcb1-2Mana1-6(Galb1-4GlcNAcb1-3Galb1-4GlcNAcb1-3Galb1-4GlcNAcb1-2)Manb1-4GlcNAcb1-4GlcNAcb-Sp24                     | 184   | 11   | 122   | 14   | 47    | 15   | 16    | 4   | 157   | 19   | 36   | 4    |
| 549 | GlcNAcb1-3Galb1-4GlcNAcb1-3Galb1-4GlcNAcb1-2Mana1-6(GlcNAcb1-3Galb1-4GlcNAcb1-3Galb1-4GlcNAcb1-3Galb1-4GlcNAcb1-3Galb1-4GlcNAcb1-2)Manb1-4GlcNAcb1-4GlcNAcb-Sp25 | 109   | 31   | 43    | 9    | 56    | 66   | 7     | 6   | 50    | 48   | 12   | 4    |
| 550 | Galb1-4GlcNAcb1-3Galb1-4GlcNAcb1-3Galb1-4GlcNAcb1-2Mana1-6(Galb1-4GlcNAcb1-3Galb1-4GlcNAcb1-3Galb1-4GlcNAcb1-3Galb1-4GlcNAcb1-2)Manb1-4GlcNAcb1-4GlcNAcb-Sp25    | 239   | 20   | 136   | 9    | 55    | 9    | 18    | 7   | 120   | 5    | 35   | 14   |
| 551 | Galb1-3GlcNAcb1-3Galb1-4GlcNAcb1-2Mana1-6(Galb1-3GlcNAcb1-3Galb1-4GlcNAcb1-2)Manb1-4GlcNAcb1-4GlcNAcb-Sp25                                                       | 182   | 14   | 103   | 26   | 20    | 6    | 13    | 8   | 81    | 27   | 24   | 7    |



|     |                                                                                                                                                                         |       |      |        |      |      |     |      |    |       |      |      |     |
|-----|-------------------------------------------------------------------------------------------------------------------------------------------------------------------------|-------|------|--------|------|------|-----|------|----|-------|------|------|-----|
| 594 | GlcNAcb1-3Galb1-4GlcNAcb1-6(Galb1-3)GalNAca-Sp14                                                                                                                        | -70   | 19   | 1      | 10   | 5    | 2   | 3    | 2  | 12    | 17   | -3   | 5   |
| 595 | GlcNAcb1-3Galb1-4GlcNAcb1-6(GlcNAcb1-3Galb1-4GlcNAcb1-3)GalNAca-Sp14                                                                                                    | -232  | 106  | -52    | 8    | 4    | 3   | 10   | 3  | -33   | 13   | 5    | 3   |
| 596 | Neu5Aca2-3Galb1-4GlcNAcb1-3Galb1-4GlcNAcb1-6(Neu5Aca2-3Galb1-4GlcNAcb1-3Galb1-4GlcNAcb1-3)GalNAca-Sp14                                                                  | -107  | 72   | -1385  | 171  | 36   | 14  | 8    | 10 | -55   | 21   | -6   | 12  |
| 597 | Neu5Aca2-6Galb1-4GlcNAcb1-3Galb1-4GlcNAcb1-3GalNAca-Sp14                                                                                                                | -7643 | 2138 | -3782  | 1683 | -161 | 64  | -138 | 31 | -1803 | 607  | -611 | 201 |
| 598 | GlcNAcb1-3Galb1-4GlcNAcb1-3Galb1-4GlcNAcb1-3GalNAca-Sp14                                                                                                                | 3     | 8    | -12    | 10   | 10   | 7   | 7    | 2  | -22   | 8    | -2   | 5   |
| 599 | Galb1-4GlcNAcb1-3Galb1-3GalNAca-Sp14                                                                                                                                    | -30   | 18   | 12     | 89   | -5   | 4   | -9   | 9  | -47   | 18   | -59  | 34  |
| 600 | Neu5Aca2-3Galb1-4GlcNAcb1-3Galb1-4GlcNAcb1-6(Galb1-3)GalNAca-Sp14                                                                                                       | 81    | 55   | 20     | 113  | -9   | 11  | -2   | 7  | -15   | 81   | -17  | 38  |
| 601 | Neu5Aca2-6Galb1-4GlcNAcb1-3Galb1-4GlcNAcb1-6(Galb1-3)GalNAca-Sp14                                                                                                       | 124   | 24   | 141    | 64   | 15   | 10  | 13   | 14 | 53    | 16   | 1    | 6   |
| 602 | Neu5Aca2-6Galb1-4GlcNAcb1-6(Galb1-3)GalNAca-Sp14                                                                                                                        | 29    | 51   | -31    | 29   | 9    | 14  | 5    | 5  | -25   | 24   | 2    | 13  |
| 603 | Neu5Aca2-3Galb1-4GlcNAcb1-3Galb1-4GlcNAcb1-2Mana1-6(Neu5Aca2-3Galb1-4GlcNAcb1-3Galb1-4GlcNAcb1-2Mana1-3)Manb1-4GlcNAcb1-4GlcNAcb-Sp12                                   | -393  | 88   | -10164 | 1040 | -164 | 33  | -5   | 3  | -4593 | 544  | -835 | 127 |
| 604 | GlcNAcb1-6(Neu5Aca2-3Galb1-3)GalNAca-Sp14                                                                                                                               | -441  | 77   | -14330 | 5753 | -813 | 693 | -6   | 7  | -7923 | 1865 | -785 | 171 |
| 605 | Neu5Aca2-6Galb1-4GlcNAcb1-3Galb1-4GlcNAcb1-6(Neu5Aca2-6Galb1-4GlcNAcb1-3Galb1-4GlcNAcb1-3)GalNAca-Sp14                                                                  | 68    | 32   | 160    | 38   | 11   | 7   | 21   | 16 | 145   | 24   | 43   | 16  |
| 606 | Neu5Aca2-6Galb1-4GlcNAcb1-3Galb1-4GlcNAcb1-3Galb1-4GlcNAcb1-2Mana1-6(Neu5Aca2-6Galb1-4GlcNAcb1-3Galb1-4GlcNAcb1-3Galb1-4GlcNAcb1-2Mana1-3)Manb1-4GlcNAcb1-4GlcNAcb-Sp12 | 542   | 37   | 313    | 23   | 38   | 7   | 27   | 13 | 380   | 77   | 56   | 20  |
| 607 | Neu5Aca2-3Galb1-4GlcNAcb1-3Galb1-4GlcNAcb1-3Galb1-4GlcNAcb1-2Mana1-6(Neu5Aca2-3Galb1-4GlcNAcb1-3Galb1-4GlcNAcb1-3Galb1-4GlcNAcb1-2Mana1-3)Manb1-4GlcNAcb1-4GlcNAcb-Sp12 | 106   | 48   | 530    | 45   | 28   | 22  | 17   | 11 | 270   | 24   | 15   | 3   |
| 608 | Neu5Aca2-6Galb1-4GlcNAcb1-3Galb1-4GlcNAcb1-2Mana1-6(Neu5Aca2-6Galb1-4GlcNAcb1-3Galb1-4GlcNAcb1-2Mana1-3)Manb1-4GlcNAcb1-4GlcNAcb-Sp12                                   | 527   | 42   | 401    | 28   | 31   | 33  | 5    | 4  | 294   | 23   | 104  | 12  |
| 609 | GlcNAcb1-3Fuca-Sp21                                                                                                                                                     | 21    | 11   | 4      | 7    | 15   | 8   | 5    | 3  | 14    | 11   | 9    | 4   |
| 610 | Galb1-3GalNAcb1-4(Neu5Aca2-8Neu5Aca2-8Neu5Aca2-3)Galb1-4Glc-Sp21                                                                                                        | 9     | 7    | 10     | 7    | 22   | 14  | 9    | 5  | 7     | 6    | 12   | 3   |

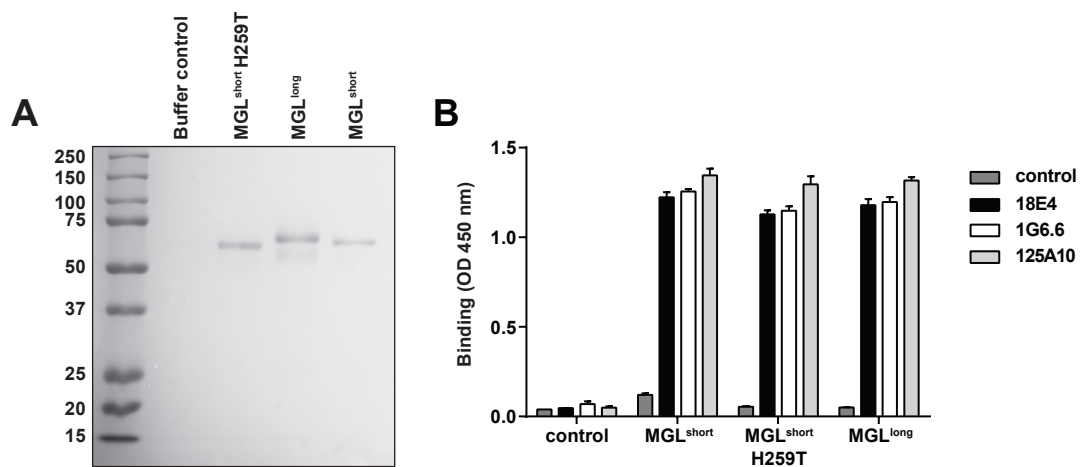

**Supporting Figure 1. Generation of functional MGL-Fc recombinant proteins.** (A) Size and purity of the purified MGL-Fc variants were evaluated using a 10% SDS-PAGE gel and Coomassie Blue staining. 1  $\mu$ g of MGL-Fc protein was loaded per lane. (B) The different MGL-Fc variants were coated on ELISA plates and probed using three MGL-specific antibodies. Isotype-matched control antibodies were used as a negative control. No significant differences in binding of the antibodies to the MGL variants could be observed. One representative experiment out of three is shown.

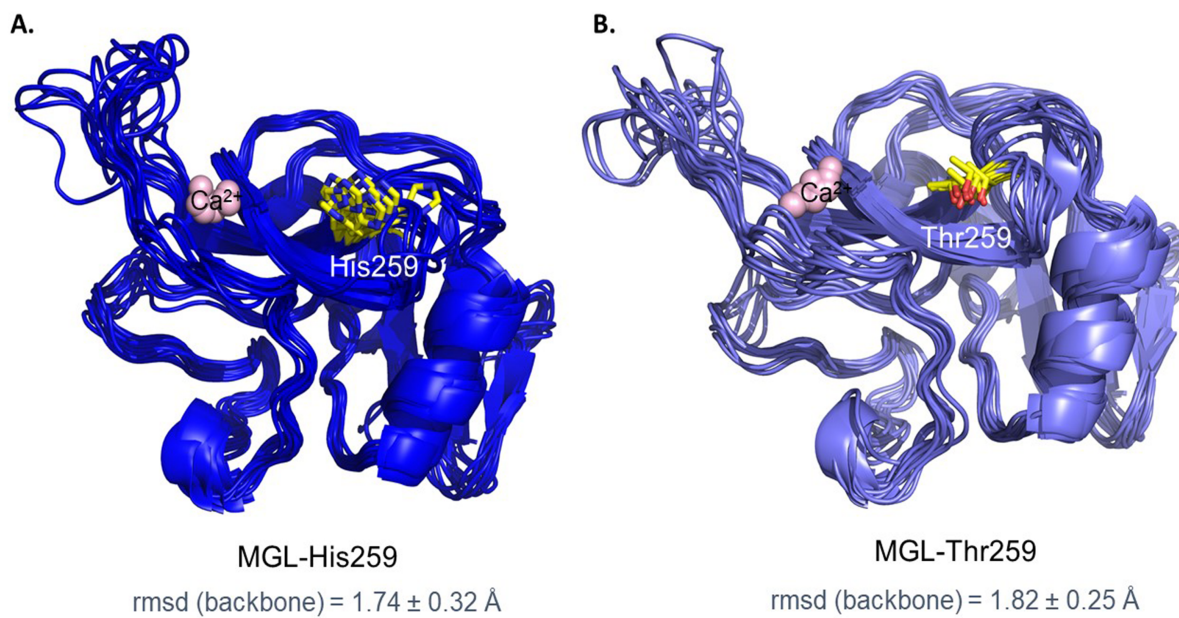

**Supporting Figure 2. Superposition of 10 frames obtained from 1 $\mu$ s MD simulation in the free state.** (A) MGL<sup>short</sup> (MGL-His259); (B). MGL<sup>short</sup> H259T (MGL-Thr259). The rmsd (Å) values calculated from the simulations for the protein backbone are indicated for both models.

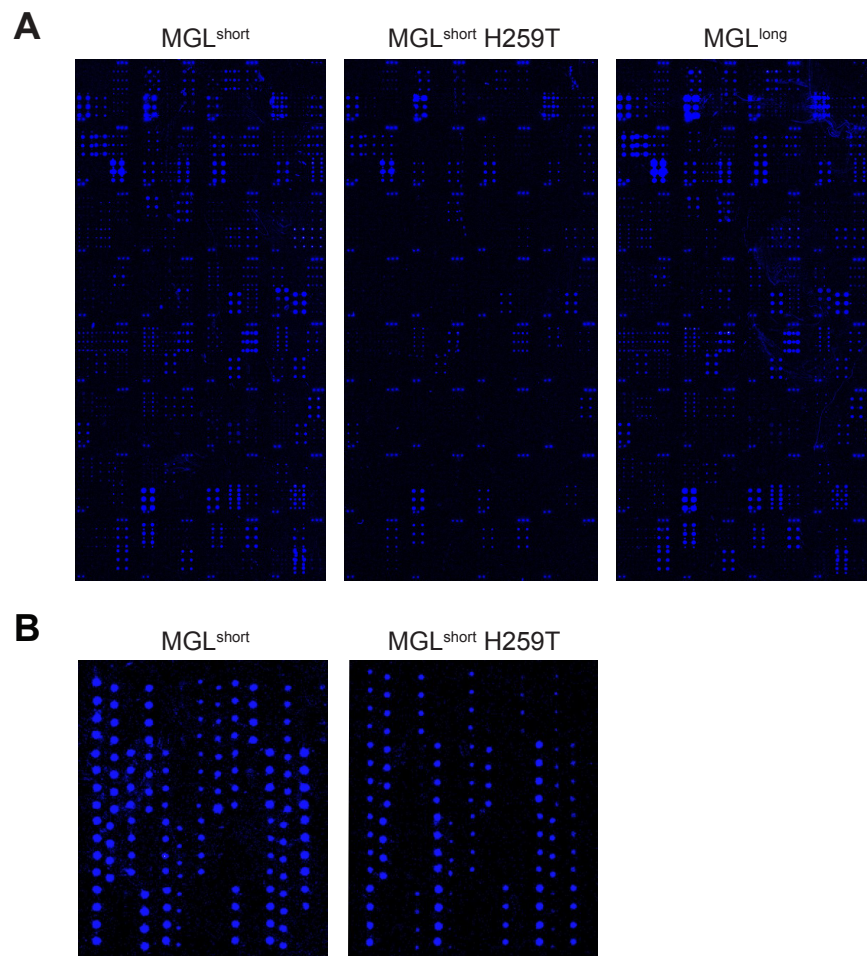

**Supporting Figure 3. Representative images of the glycan and Tn-glycopeptide arrays.** (A) Images of the CFG glycan array probed with MGL<sup>short</sup>, MGL<sup>short</sup> H259T and MGL<sup>long</sup> at a concentration of 200  $\mu\text{g/ml}$ . (B) Images of the Tn-glycopeptide array probed with MGL<sup>short</sup> and MGL<sup>short</sup> H259T at a concentration of 10  $\mu\text{g/ml}$ .
